# Supplementary material for: Synthesis of furo[3,4-c]quinolin-3(1H)-one derivatives through TMG catalyzed intramolecular aza-MBH reaction based on the furanones
Source: Royal Society of Chemistry journal article supplement (doi:10.1039/c4ra13796e), 2014-12-15

## *Supporting Information*

# **Synthesis of furo[3,4-c]quinolin-3(1*H*)-one derivatives through TMG Catalyzed Intramolecular aza-MBH Reaction based on the furanones**

**Dawei Yin<sup>†</sup>, Wei Wang<sup>†</sup>, Yangqiu Peng, Zemei Ge, Tieming Cheng, Xin  
Wang<sup>‡</sup> and Runtao Li<sup>\*</sup>**

*State Key Laboratory of Natural and Biomimetic Drugs, School of Pharmaceutical Sciences,*

*Peking University, Beijing 100191, China*

## **Content**

|                                                                                            |    |
|--------------------------------------------------------------------------------------------|----|
| General Information -----                                                                  | 2  |
| Synthesis of 2(5 <i>H</i> )-furanone derivatives <b>1</b> -----                            | 3  |
| General procedure for the furo[3,4- <i>c</i> ]quinolin-3(1 <i>H</i> )-one derivatives----- | 4  |
| Scope of the intramolecular aza-MBH reaction-----                                          | 5  |
| NMR Spectra for the final products <b>3a-3q, 3r'-3t'</b> -----                             | 12 |

## General information

Unless otherwise stated, all reagents were purchased from commercial suppliers and were used without further purification. 2(5H)-furanone derivatives **1** was not commercially available and was prepared in our lab. Reactions were monitored by thin layer chromatography (TLC) on GF<sub>254</sub> silica gel plates. <sup>1</sup>H NMR spectra and <sup>13</sup>C NMR spectra were recorded on a Bruker AVANCE III 400 (400 MHz) spectrometer in needful D-reagents with tetramethylsilane (TMS) as an internal reference. Data for <sup>1</sup>H NMR were reported as follows: chemical shift (ppm), and multiplicity (s = singlet, d = doublet, t = triplet, dd = double of doublet, m = multiplet), coupling constants (Hz) and integration; Data for <sup>13</sup>C NMR were reported as ppm. Melting points were measured on an X<sub>4</sub>-type micro-melting point apparatus and were uncorrected.

## Synthesis of 2(5H)-furanone derivatives **1**

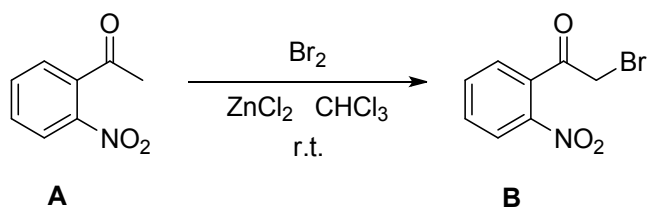

To the solution of **A** (57.6mmol) and  $\text{ZnCl}_2$  (100mg) in chloroform (100ml) was added the solution of  $\text{Br}_2$  (3ml 57.6mmol) in chloroform (20ml) dropwise for a period of 2h at room temperature. The mixture was stirred at room temperature for another 10h. Then, the reaction was quenched with 10% (w/w)  $\text{NaHCO}_3$  aq. (50ml) and extracted with chloroform ( $3 \times 30\text{ml}$ ). The combined organic layer was dried by  $\text{Na}_2\text{SO}_4$ , filtered and concentrated *in vacuo*. The residue was recrystallized to give the desired product **B** (yield 79%) as white solid.

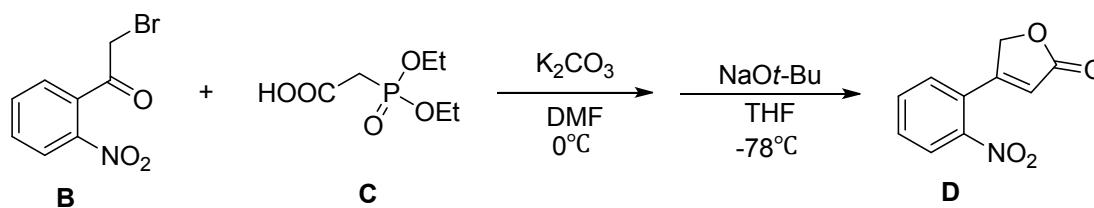

To the solution of **B** (10mmol) and **C** (10mmol) in DMF (10ml) was added  $\text{K}_2\text{CO}_3$  (10.5mmol) at  $0^\circ\text{C}$ . After 1h, water (40ml) was poured into the reaction mixture. Then 20% (w/w)  $\text{HCl}$  aq. was added to the solution to adjust pH between 4 and 5. The mixture was extracted with ethyl acetate ( $3 \times 20\text{ml}$ ). The combined organic layer was dried by  $\text{Na}_2\text{SO}_4$ , filtered and concentrated *in vacuo*. The residue was dissolved in dry THF (80ml) and stirred at  $-78^\circ\text{C}$  for 10 minutes. Then, the suspending solution of  $\text{NaOt-Bu}$  (12mmol) in dry THF (25ml) was added dropwise into the reaction mixture for a period of 30mins. After that, the reaction mixture was stirred at  $-78^\circ\text{C}$  for 1h and warmed to room temperature for another 1h. Then 20% (w/w)  $\text{HCl}$  aq. was added to adjust the pH between 5 and 6. After removed the solvent, the residue was treated with water (50ml) and extracted with ethyl acetate ( $3 \times 20\text{ml}$ ). The combined organic layer was dried by  $\text{Na}_2\text{SO}_4$ , filtered and concentrated *in vacuo*. The residue was purified by silica gel column chromatography to give the desired product **D** (50% for 2 steps) as yellow solid.

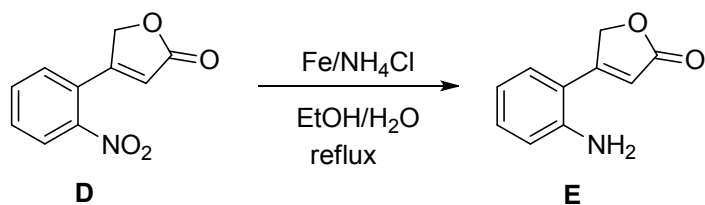

To the solution of **D** (5.4mmol) in ethanol (27ml) was added water (3ml), powder Fe (21.6mmol), and  $\text{NH}_4\text{Cl}$  (21.6mmol) subsequently. After 8 hours' reflux, the mixture was filtered and the filtrate was treated with water (50ml) and extracted with  $\text{CH}_2\text{Cl}_2$  (25ml $\times$ 3). The combined organic layer was dried by  $\text{Na}_2\text{SO}_4$ , filtered and concentrated *in vacuo*. The residue was recrystallized by ethanol to give the desired product **E** (yield 71%) as red solid.

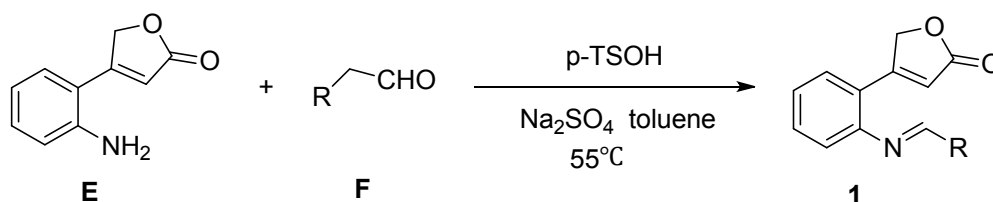

To the solution of **E** (0.5mmol), PTSA (0.025mmol) and  $\text{Na}_2\text{SO}_4$  (1.5g) in toluene (5ml) was added the corresponding aldehyde. After stirred at  $55^\circ\text{C}$  for 6h, the mixture was cooled to room temperature. Then the solvent was removed and the residue was dissolved in hot ethanol and filtered. The filtrate was concentrated *in vacuo* and the residue was recrystallized by ethanol to give the desired product **1** (yield 60%-82%) as solid.

General procedure for the synthesis of the 4,5-dihydrofuro[3,4-c]quinolin-3(1H)-one derivatives

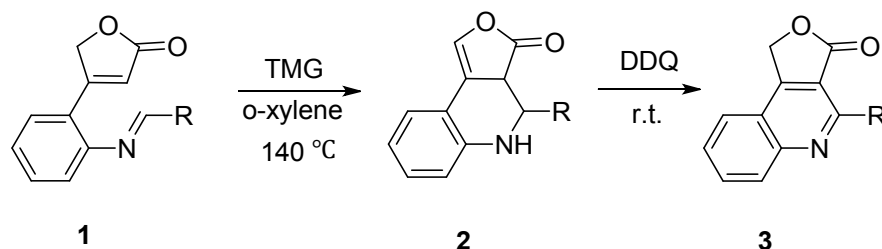

Compound **1** (0.2mmol), TMG (0.04mmol) was dissolved in *o*-xylene (2ml). After 7 hours' reflux, the reaction mixture was cooled to room temperature. Then the solvent was removed and the residue was purified by silica gel column chromatography to give the pure intermediate **2**. Later on, the intermediate **2** was dissolved in  $\text{CH}_2\text{Cl}_2$  and DDQ (1eq.) was added, stirred for five

minutes at room temperature. The solution was washed by saturated NaHCO<sub>3</sub> solution; the organic layer was dried by Na<sub>2</sub>SO<sub>4</sub>, filtered. The filtrate was concentrated to give the final product **3** as solid.

### Scope of the highly substituted quinoline derivatives

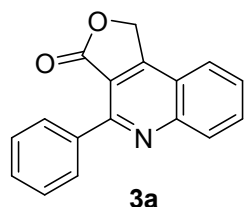

**2-Phenylfuro[3,4-c]quinolin-3(1H)-one 3a:** Obtained in 69% yield; white solid; m.p. 241.5-244.7°C; <sup>1</sup>H NMR (400 MHz, DMSO): δ 8.22 (d, *J* = 8.4 Hz, 1H), δ 8.13 (d, *J* = 8.0 Hz, 1H), δ 8.01 (t, *J* = 7.6 Hz, 1H), δ 7.88-7.94 (m, 2H), δ 7.79 (t, *J* = 7.6 Hz, 1H), δ 7.50-7.56 (m, 3H), δ 5.86 (s, 2H); <sup>13</sup>C NMR (100 MHz, CDCl<sub>3</sub>): δ 169.0, 158.1, 157.1, 149.1, 136.3, 133.1, 130.7, 130.0, 130.0, 128.1, 128.1, 123.0, 121.0, 116.5, 67.4; ES-HRMS: Calcd for C<sub>17</sub>H<sub>12</sub>NO<sub>2</sub> [M+H]<sup>+</sup>, 262.0868, Found 262.0860.

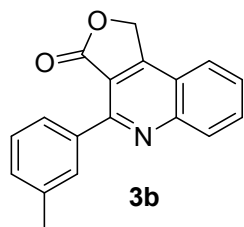

**2-(3-Methylphenyl)furo[3,4-c]quinolin-3(1H)-one 3b:** Obtained in 70% yield; yellow solid; m.p. 184.6-185.6°C; <sup>1</sup>H NMR (400 MHz, DMSO): δ 8.23 (d, *J* = 8.4 Hz, 1H), δ 8.15 (d, *J* = 7.6 Hz, 1H), δ 7.99-8.06 (m, 1H), δ 7.81 (t, *J* = 7.6 Hz, 1H), δ 7.68-7.74 (m, 2H), δ 7.41 (t, *J* = 7.6 Hz, 1H), δ 7.35 (d, *J* = 7.6 Hz, 1H), δ 5.87 (s, 2H); δ 2.42 (s, 3H); <sup>13</sup>C NMR (100 MHz, DMSO): δ 169.0, 159.7, 156.0, 148.1, 136.8, 136.4, 133.3, 130.4, 130.1, 129.5, 128.0, 127.5, 127.3, 124.6, 120.7, 116.0, 68.1, 21.0; ES-HRMS: Calcd for C<sub>18</sub>H<sub>14</sub>NO<sub>2</sub> [M+H]<sup>+</sup>, 276.1025, Found 276.1025.

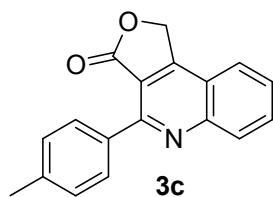

**2-(4-Methylphenyl)furo[3,4-c]quinolin-3(1H)-one 3c:** Obtained in 64% yield; yellow solid; m.p.

204.6-205.9°C; <sup>1</sup>H NMR (400 MHz, DMSO): δ 8.20 (d, *J* = 8.4 Hz, 1H), δ 8.12 (d, *J* = 8.0 Hz, 1H), δ 8.00 (t, *J* = 7.6 Hz, 1H), δ 7.83 (d, *J* = 8.0 Hz, 2H), δ 7.77 (t, *J* = 7.6 Hz, 1H), δ 7.33 (d, *J* = 8.0 Hz, 2H), δ 5.85 (s, 2H); δ 2.41(s, 3H); <sup>13</sup>C NMR (100 MHz, DMSO): δ 169.5, 160.1, 156.3, 148.7, 139.7, 134.2, 133.7, 130.4, 130.0, 128.8, 128.3, 125.0, 121.1, 116.4, 68.6, 21.5; ES-HRMS: Calcd for C<sub>18</sub>H<sub>14</sub>NO<sub>2</sub> [M+H]<sup>+</sup>, 276.1025, Found 276.1025.

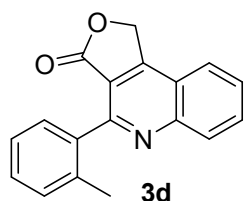

**2-(2-Methylphenyl)furo[3,4-*c*]quinolin-3(1*H*)-one 3d:** Obtained in 75% yield; yellow solid; m.p. 176.2-177.7°C; <sup>1</sup>H NMR (400 MHz, DMSO): δ 8.20 (dd, *J* = 13.7, 4.8 Hz, 2H), 8.04 (m, 1H), 7.82 (m, 1H), 7.44 – 7.37 (m, 1H), 7.36 – 7.27 (m, 3H), 5.90 (s, 1H), 2.16 (s, 2H). <sup>13</sup>C NMR (100 MHz, DMSO): δ 169.2, 159.2, 157.1, 148.7, 137.2, 136.3, 133.6, 130.2, 130.1, 130.0, 129.1, 128.6, 125.6, 125.2, 121.4, 117.5, 68.8, 19.8. ES-HRMS: Calcd for C<sub>18</sub>H<sub>14</sub>NO<sub>2</sub> [M+H]<sup>+</sup>, 276.1023, Found 276.1019.

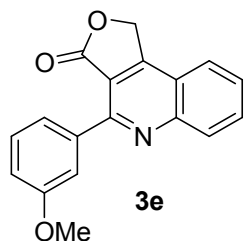

**2-(3-Methoxyphenyl)furo[3,4-*c*]quinolin-3(1*H*)-one 3e:** Obtained in 65% yield; yellow solid; m.p. 176.9-178.2°C; <sup>1</sup>H NMR (400 MHz, DMSO): δ 8.24 (d, *J* = 8.4 Hz, 1H), δ 8.16 (d, *J* = 8.0 Hz, 1H), δ 8.03 (t, *J* = 7.6 Hz, 1H), δ 7.82 (t, *J* = 7.6 Hz, 1H), δ 7.41-7.52 (m, 3H), δ 7.11 (d, *J* = 8.4 Hz, 1H), δ 5.88 (s, 2H); δ 3.84(s, 3H); <sup>13</sup>C NMR (100 MHz, DMSO): δ 169.4, 160.2, 159.1, 156.1, 148.6, 138.2, 133.8, 130.1, 129.3, 128.6, 125.1, 122.7, 121.3, 116.6, 116.0, 115.7, 68.6, 55.7; ES-HRMS: Calcd for C<sub>18</sub>H<sub>14</sub>NO<sub>3</sub> [M+H]<sup>+</sup>, 292.0974, Found 292.0973.

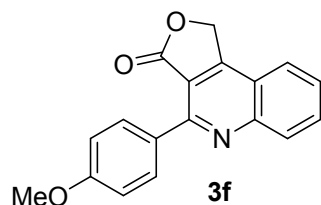

**2-(4-Methoxyphenyl)furo[3,4-*c*]quinolin-3(1*H*)-one 3f:** Obtained in 35% yield; yellow solid;

m.p. 169.6-171.3°C; <sup>1</sup>H NMR (400 MHz, DMSO): δ 8.19 (d, *J* = 8.4 Hz, 1H), δ 8.11 (d, *J* = 8.0 Hz, 1H), δ 8.00 (t, *J* = 8.0 Hz, 1H), δ 7.94 (d, *J* = 8.0 Hz, 2H), δ 7.77 (t, *J* = 7.6 Hz, 1H), δ 7.08 (d, *J* = 8.8 Hz, 2H), δ 5.86 (s, 2H); δ 3.86 (s, 3H); <sup>13</sup>C NMR (100 MHz, DMSO): δ 169.7, 161.1, 160.2, 155.9, 148.7, 133.7, 132.1, 129.9, 129.3, 128.1, 125.0, 121.0, 116.3, 113.7, 68.6, 55.8; ES-HRMS: Calcd for C<sub>18</sub>H<sub>14</sub>NO<sub>3</sub>[M+H]<sup>+</sup>, 292.0974, Found 292.0970.

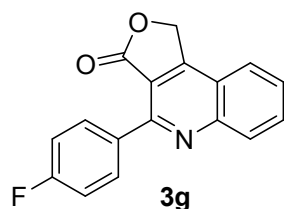

**2-(4-fluorophenyl)furo[3,4-c]quinolin-3(1H)-one 3g:** Obtained in 44% yield; yellow solid; m.p. >250°C; <sup>1</sup>H NMR (400 MHz, DMSO): δ 8.24 (d, *J* = 8.4 Hz, 1H), δ 8.17 (d, *J* = 8.0 Hz, 1H), δ 7.96-8.07 (m, 3H), δ 7.82 (t, *J* = 7.6 Hz, 1H), δ 7.37 (t, *J* = 8.8 Hz, 2H), δ 7.50-7.56 (m, 3H), δ 5.90 (s, 2H); <sup>13</sup>C NMR (100 MHz, DMSO): δ 169.6, 163.6 (d, 245.7Hz), 160.2, 155.2, 148.6, 133.8, 133.3 (d, 2.6Hz), 132.8 (d, 8.6Hz), 130.0, 128.6, 125.1, 121.3, 116.5, 115.2 (d, 21.5Hz), 68.7; ES-HRMS: Calcd for C<sub>17</sub>H<sub>10</sub>FNO<sub>2</sub>[M+H]<sup>+</sup>, 280.0774, Found 280.0771.

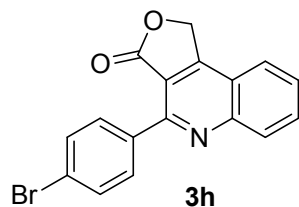

**2-(4-bromophenyl)furo[3,4-c]quinolin-3(1H)-one 3h:** Obtained in 53% yield; yellow solid; m.p. >235°C; <sup>1</sup>H NMR (400 MHz, CDCl<sub>3</sub>): δ 8.34 (d, *J* = 8.5 Hz, 1H), 7.98 (t, *J* = 7.8 Hz, 1H), 7.92 (dd, *J* = 12.0, 8.6 Hz, 3H), 7.75 (t, *J* = 7.5 Hz, 1H), 7.70 (d, *J* = 8.4 Hz, 2H), 5.72 (s, 2H); <sup>13</sup>C NMR (100 MHz, DMSO): δ 169.5, 160.2, 155.1, 148.6, 136.1, 133.9, 132.5, 131.2, 130.1, 128.7, 125.2, 123.9, 121.4, 116.6, 68.8; ES-HRMS: Calcd for C<sub>17</sub>H<sub>11</sub>BrNO<sub>2</sub>[M+H]<sup>+</sup>, 339.9973, Found 339.9966.

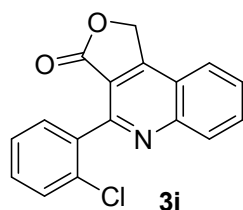

**2-(2-chlorophenyl)furo[3,4-c]quinolin-3(1H)-one 3i:** Obtained in 52% yield; red solid; m.p.

156.5-158.5°C; <sup>1</sup>H NMR (400 MHz, CDCl<sub>3</sub>) δ 8.38 (d, *J* = 8.5 Hz, 1H), 8.06 – 7.90 (m, 2H), 7.80 (t, *J* = 7.5 Hz, 1H), 7.55 (m, 2H), 7.51 – 7.42 (m, 2H), 5.73 (s, 2H). <sup>13</sup>C NMR (100 MHz, CDCl<sub>3</sub>): δ 168.3, 156.7, 155.0, 149.1, 135.9, 133.3, 133.0, 130.8, 130.6, 129.5, 128.6, 126.9, 123.2, 121.6, 118.1, 109.9, 67.6. ES-HRMS: Calcd for C<sub>17</sub>H<sub>11</sub>ClNO<sub>2</sub> [M+H]<sup>+</sup>, 296.0472, Found 296.0476.

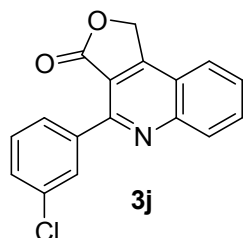

**2-(3-chlorophenyl)furo[3,4-c]quinolin-3(1H)-one 3j:** Obtained in 40% yield; white solid; m.p. >210°C; <sup>1</sup>H NMR (400 MHz, DMSO): δ 8.27 (d, *J* = 8.4 Hz, 1H), δ 8.19 (d, *J* = 8.0 Hz, 1H), δ 8.06 (t, *J* = 7.2 Hz, 1H), δ 7.98 (s, 1H), δ 7.91 (t, *J* = 7.2 Hz, 1H), δ 7.85 (d, *J* = 7.2 Hz, 1H), δ 7.55-7.65 (m, 2H), δ 5.91 (s, 2H); <sup>13</sup>C NMR (100 MHz, DMSO): δ 169.5, 160.1, 154.6, 148.5, 138.8, 136.7, 133.9, 132.9, 132.6, 130.1, 129.8, 129.1, 128.8, 125.1, 121.4, 116.7, 68.84; ES-HRMS: Calcd for C<sub>17</sub>H<sub>11</sub>ClNO<sub>2</sub> [M+H]<sup>+</sup>, 296.0478, Found 296.0481.

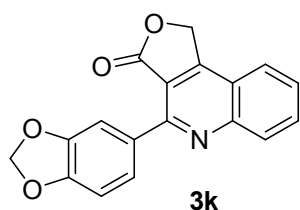

**2-(benzo[d][1,3]dioxol-5-yl)furo[3,4-c]quinolin-3(1H)-one 3k:** Obtained in 40% yield; yellow solid; m.p. 219.8-221.2°C; <sup>1</sup>H NMR (400 MHz, DMSO): δ 8.19 (d, *J* = 8.4 Hz, 1H), δ 8.12 (d, *J* = 8.0 Hz, 1H), δ 7.97-8.03 (m, 1H), δ 7.75-7.80 (m, 1H), δ 7.49-7.54 (m, 2H), δ 7.07 (d, *J* = 8.0 Hz, 1H), δ 6.14 (s, 2H); δ 5.85 (s, 2H). <sup>13</sup>C NMR (100 MHz, DMSO): δ 169.6, 160.2, 155.6, 149.1, 148.6, 147.3, 133.7, 130.9, 129.9, 128.3, 125.2, 125.0, 121.1, 116.4, 110.7, 108.2, 101.9, 68.6; ES-HRMS: Calcd for C<sub>18</sub>H<sub>12</sub>NO<sub>4</sub> [M+H]<sup>+</sup>, 306.0766, Found 306.0768.

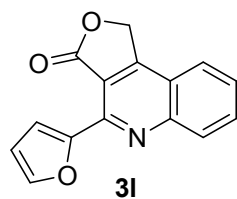

**2-(furan-2-yl)furo[3,4-c]quinolin-3(1H)-one 3l:** Obtained in 50% yield; brown solid; m.p. >250°C; <sup>1</sup>H NMR (400 MHz, DMSO): δ 8.18 (d, *J* = 8.5 Hz, 1H), 8.09 (dd, *J* = 8.9, 5.9 Hz, 2H),



8.04 – 7.96 (m, 2H), 7.75 (t,  $J = 7.5$  Hz, 1H), 6.77 (m, 1H), 5.87 (s, 2H).  $^{13}\text{C}$  NMR (100 MHz, DMSO):  $\delta$  169.4, 160.6, 150.1, 148.4, 146.2, 144.8, 134.0, 129.7, 128.3, 125.1, 120.8, 117.5, 115.0, 112.8, 68.8. ES-HRMS: Calcd for  $\text{C}_{15}\text{H}_{10}\text{NO}_3$   $[\text{M}+\text{H}]^+$ , 252.0655, Found 252.0655.

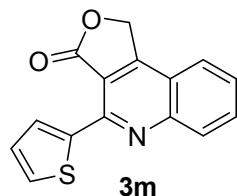

**2-(thiophen-2-yl)furo[3,4-*c*]quinolin-3(1*H*)-one 3m:** Obtained in 39% yield; yellow solid; m.p.  $>210^\circ\text{C}$ ;  $^1\text{H}$  NMR (400 MHz, DMSO):  $\delta$  8.82 (dd,  $J = 3.8, 1.0$  Hz, 1H), 8.13 – 8.05 (m, 2H), 7.99 (m,  $J = 8.5, 6.9, 1.4$  Hz, 1H), 7.83 (dd,  $J = 5.1, 1.0$  Hz, 1H), 7.75 (m,  $J = 8.1, 7.0, 1.1$  Hz, 1H), 7.27 (dd,  $J = 5.1, 3.9$  Hz, 1H), 5.89 (s, 2H).  $^{13}\text{C}$  NMR (100 MHz, DMSO):  $\delta$  169.9, 160.9, 149.2, 148.2, 142.7, 134.1, 132.4, 131.7, 129.3, 129.0, 128.2, 125.1, 120.9, 115.3, 68.9. ES-HRMS: Calcd for  $\text{C}_{15}\text{H}_{10}\text{NO}_2\text{S}$   $[\text{M}+\text{H}]^+$ , 268.0429, Found 268.0426.

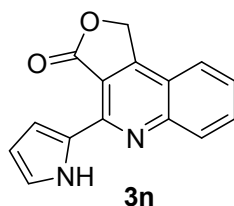

**2-(1*H*-pyrrol-2-yl)furo[3,4-*c*]quinolin-3(1*H*)-one 3n:** Obtained in 59% yield; yellow solid; m.p.  $>210^\circ\text{C}$ ;  $^1\text{H}$  NMR (400 MHz, DMSO):  $\delta$  11.93 (s, 1H), 8.07 (d,  $J = 8.5$  Hz, 1H), 8.01 (d,  $J = 8.1$  Hz, 1H), 7.94 (t,  $J = 7.6$  Hz, 1H), 7.73 (s, 1H), 7.65 (t,  $J = 7.4$  Hz, 1H), 7.13 (s, 1H), 6.29 (s, 1H), 5.88 (s, 2H).  $^{13}\text{C}$  NMR (100 MHz, DMSO):  $\delta$  170.9, 160.8, 148.9, 146.9, 133.9, 129.7, 128.9, 126.9, 125.1, 123.5, 120.1, 115.4, 114.6, 110.3, 69.3. ES-HRMS: Calcd for  $\text{C}_{15}\text{H}_{11}\text{N}_2\text{O}_2$   $[\text{M}+\text{H}]^+$ , 251.0815, Found 251.0817.

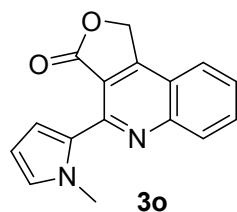

**2-(1-methyl-1*H*-pyrrol-2-yl)furo[3,4-*c*]quinolin-3(1*H*)-one 3o:** Obtained in 50% yield; yellow solid; m.p.  $>210^\circ\text{C}$ ;  $^1\text{H}$  NMR (400 MHz, DMSO):  $\delta$  8.11 (d,  $J = 8.4$  Hz, 1H), 8.05 (d,  $J = 8.0$  Hz, 1H), 7.99 – 7.92 (m, 1H), 7.71 (t,  $J = 7.5$  Hz, 1H), 7.11 – 7.02 (m, 2H), 6.17 (dd,  $J = 3.7, 2.7$  Hz,

1H), 5.81 (s, 2H), 3.98 (s, 3H). <sup>13</sup>C NMR (100 MHz, DMSO): δ 169.3, 160.4, 148.8, 148.2, 133.6, 129.4, 128.5, 128.0, 127.6, 124.9, 120.1, 117.5, 115.9, 107.6, 68.2, 37.1. ES-HRMS: Calcd for C<sub>16</sub>H<sub>13</sub>N<sub>2</sub>O<sub>2</sub> [M+H]<sup>+</sup>, 265.0971, Found 265.0971.

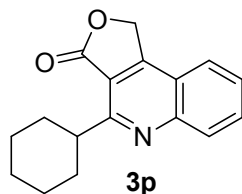

**2-cyclohexylfuro[3,4-c]quinolin-3(1H)-one 3p**: Obtained in 75% yield; white solid; m.p. 179.1-182.3°C; <sup>1</sup>H NMR (400 MHz, CDCl<sub>3</sub>): δ 8.22 (d, *J* = 8.5 Hz, 1H), 7.92 – 7.84 (m, 1H), 7.79 (d, *J* = 8.1 Hz, 1H), 7.63 (dd, *J* = 11.1, 4.0 Hz, 1H), 5.60 (s, 2H), 3.84 (m, 1H), 2.05 – 1.71 (m, 7H), 1.59 – 1.49 (m, 2H), 1.43 – 1.30 (m, 1H). <sup>13</sup>C NMR (100 MHz, CDCl<sub>3</sub>): δ 169.9, 165.0, 156.7, 149.3, 132.4, 130.3, 127.2, 123.0, 120.8, 116.5, 67.5, 58.4, 41.3, 31.5, 26.4, 26.0, 18.4. ES-HRMS: Calcd for C<sub>17</sub>H<sub>18</sub>NO<sub>2</sub> [M+H]<sup>+</sup>, 268.1328, Found 268.1332.

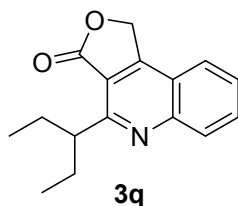

**2-(pentan-3-yl)furo[3,4-c]quinolin-3(1H)-one 3q**: Obtained in 45% yield; white solid; m.p. 116.5-117.2°C; <sup>1</sup>H NMR (400 MHz, CDCl<sub>3</sub>): δ 8.24 (d, *J* = 8.5 Hz, 1H), 7.94 – 7.87 (m, 1H), 7.83 (d, *J* = 8.1 Hz, 1H), 7.66 (t, *J* = 7.2 Hz, 1H), 5.63 (s, 2H), 4.02 – 3.86 (m, 1H), 2.12 – 1.94 (m, 2H), 1.93 – 1.76 (m, 2H), 0.85 (t, *J* = 7.4 Hz, 6H). <sup>13</sup>C NMR (100 MHz, CDCl<sub>3</sub>): δ 164.7, 156.2, 149.4, 132.4, 130.3, 127.2, 123.0, 120.6, 117.7, 67.3, 44.7, 27.3, 11.9. ES-HRMS: Calcd for C<sub>16</sub>H<sub>18</sub>NO<sub>2</sub> [M+H]<sup>+</sup>, 256.1328, Found 256.1332.

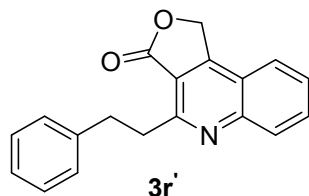

**2-phenethylfuro[3,4-c]quinolin-3(1H)-one 3r'**: Obtained in 49% yield; yellow solid; m.p. 166.5-169.4°C; <sup>1</sup>H NMR (400 MHz, CDCl<sub>3</sub>): δ 8.25 (d, *J* = 8.5 Hz, 1H), 7.99 – 7.59 (m, 3H), 7.48 – 7.12 (m, 6H), 5.64 (s, 2H), 3.76 – 3.63 (m, 2H), 3.18 (dd, *J* = 9.7, 6.8 Hz, 2H). <sup>13</sup>C NMR (100 MHz, CDCl<sub>3</sub>): δ 169.9, 160.0, 156.9, 149.1, 141.4, 132.8, 130.0, 128.7, 128.3, 127.6, 126.0, 124.7, 123.1,

121.0, 117.3, 110.0, 67.8, 36.8, 35.0. ES-HRMS: Calcd for C<sub>19</sub>H<sub>16</sub>NO<sub>2</sub> [M+H]<sup>+</sup>, 290.1175, Found 290.1170.

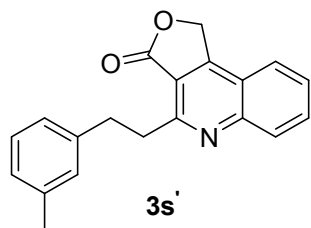

**2-(3-methylphenethyl)furo[3,4-c]quinolin-3(1H)-one 3s'**: Obtained in 52% yield; yellow solid; m.p. 166.5-170.1°C; <sup>1</sup>H NMR (400 MHz, CDCl<sub>3</sub>): δ 8.27 (d, *J* = 8.5 Hz, 1H), 7.97 – 7.90 (m, 1H), 7.84 (d, *J* = 8.1 Hz, 1H), 7.69 (t, *J* = 7.5 Hz, 1H), 7.24 (d, *J* = 5.8 Hz, 1H), 7.21 (d, *J* = 4.5 Hz, 2H), 7.04 (t, *J* = 3.6 Hz, 1H), 5.66 (s, 2H), 3.72 – 3.65 (m, 2H), 3.19 – 3.07 (m, 2H), 2.36 (s, 3H). <sup>13</sup>C NMR (100 MHz, CDCl<sub>3</sub>): δ 160.2, 156.9, 149.2, 141.3, 137.9, 132.8, 130.0, 129.5, 128.2, 127.5, 126.7, 125.7, 124.0, 123.1, 121.1, 117.3, 67.8, 36.9, 35.0, 21.4. ES-HRMS: Calcd for C<sub>20</sub>H<sub>18</sub>NO<sub>2</sub> [M+H]<sup>+</sup>, 304.1332, Found 304.1326.

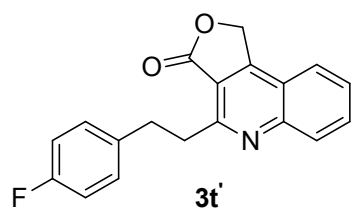

**2-(4-fluorophenethyl)furo[3,4-c]quinolin-3(1H)-one 3t'**: Obtained in 49% yield; yellow solid; m.p. 187.1-190.7°C; <sup>1</sup>H NMR (400 MHz, CDCl<sub>3</sub>): δ 8.24 (d, *J* = 8.5 Hz, 1H), 7.93 (s, 1H), 7.83 (d, *J* = 8.0 Hz, 0H), 7.70 (d, *J* = 7.5 Hz, 1H), 7.33 (dd, *J* = 8.2, 5.6 Hz, 1H), 6.97 (t, *J* = 8.7 Hz, 1H), 3.66 (dd, *J* = 9.5, 6.9 Hz, 1H), 3.18 – 3.10 (m, 1H). <sup>13</sup>C NMR (100 MHz, CDCl<sub>3</sub>): δ 169.8, 160.1 (d, *J* = 242 Hz), 159.7, 156.9, 149.1, 137.0 (d, *J* = 3.1 Hz), 132.8, 130.1 (d, *J* = 6 Hz), 127.6, 123.1, 121.0, 117.2, 115.1, 114.9, 67.8, 36.8, 34.1. ES-HRMS: Calcd for C<sub>19</sub>H<sub>15</sub>FNO<sub>2</sub> [M+H]<sup>+</sup>, 308.1081, Found 308.1075.

# NMR Spectra for final Products 3a-3q, 3r'-3t'

## <sup>1</sup>H NMR and <sup>13</sup>C NMR spectra of 3a

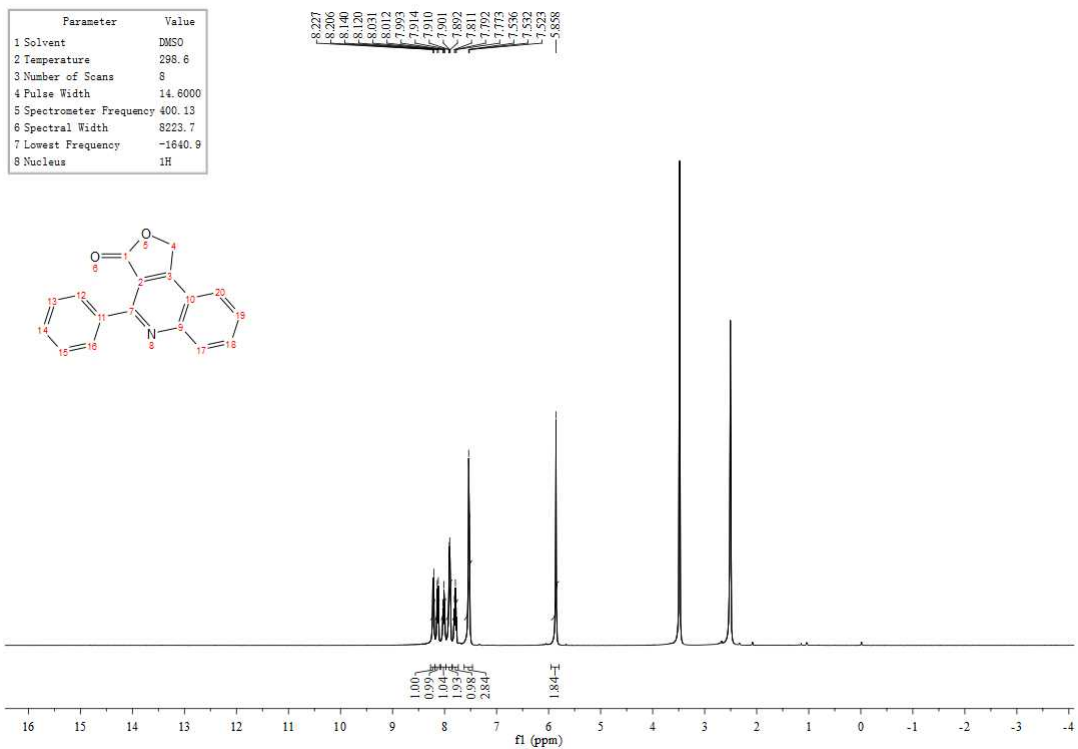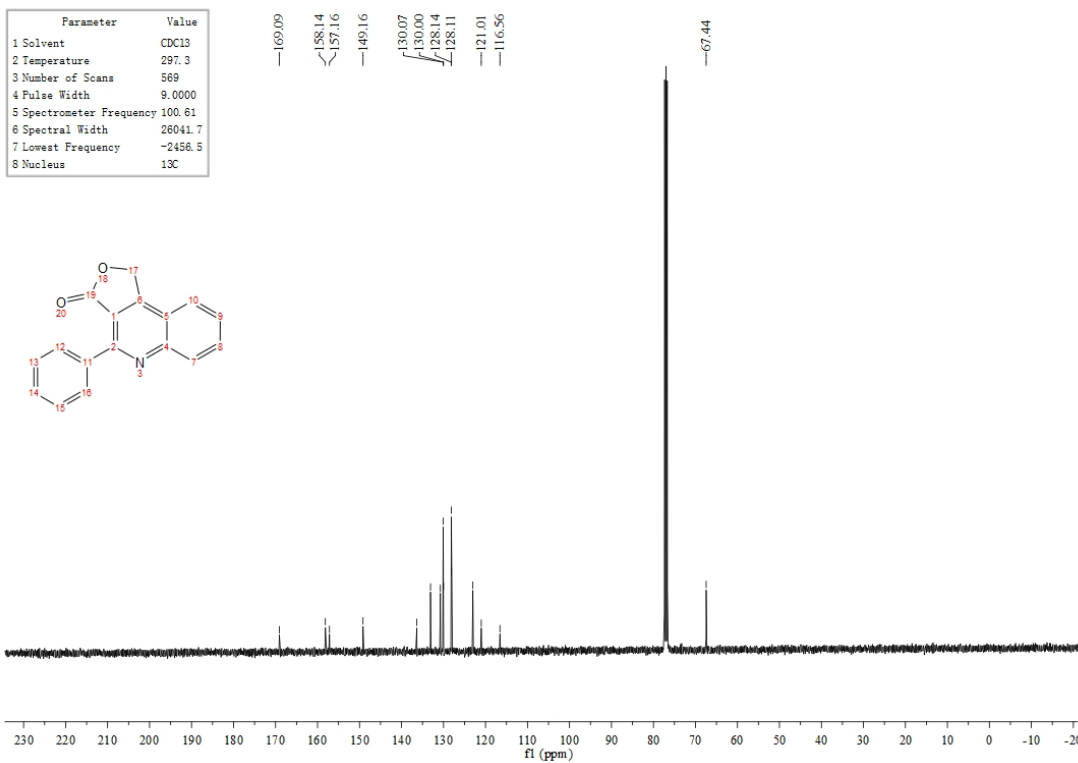

# <sup>1</sup>H NMR and <sup>13</sup>C NMR spectra of 3b

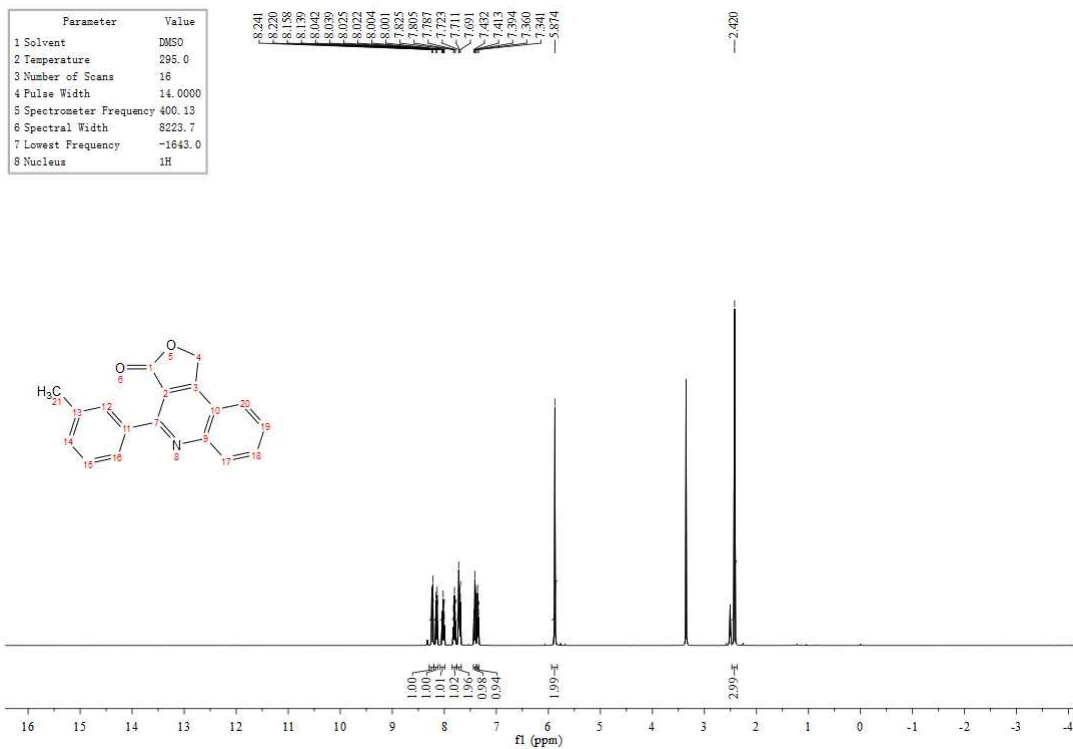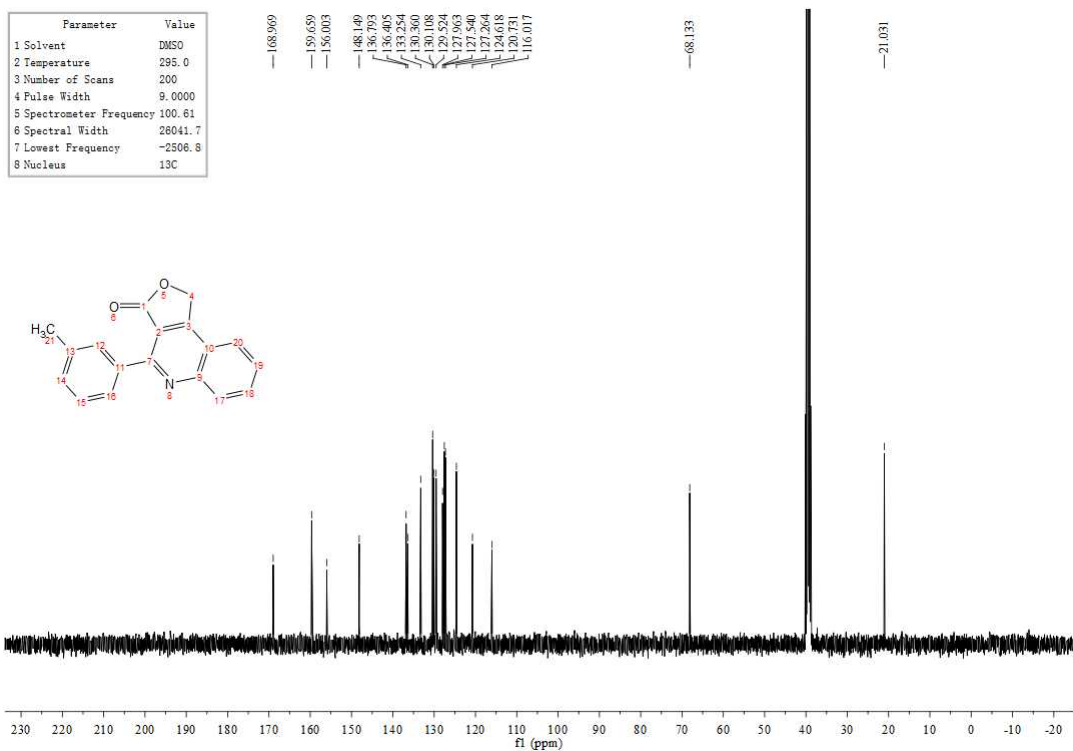

# <sup>1</sup>H NMR and <sup>13</sup>C NMR spectra of 3c

| Parameter                | Value          |
|--------------------------|----------------|
| 1 Solvent                | DMSO           |
| 2 Temperature            | 297.0          |
| 3 Number of Scans        | 8              |
| 4 Pulse Width            | 14.6000        |
| 5 Spectrometer Frequency | 400.13         |
| 6 Spectral Width         | 8223.7         |
| 7 Lowest Frequency       | -1640.9        |
| 8 Nucleus                | <sup>1</sup> H |

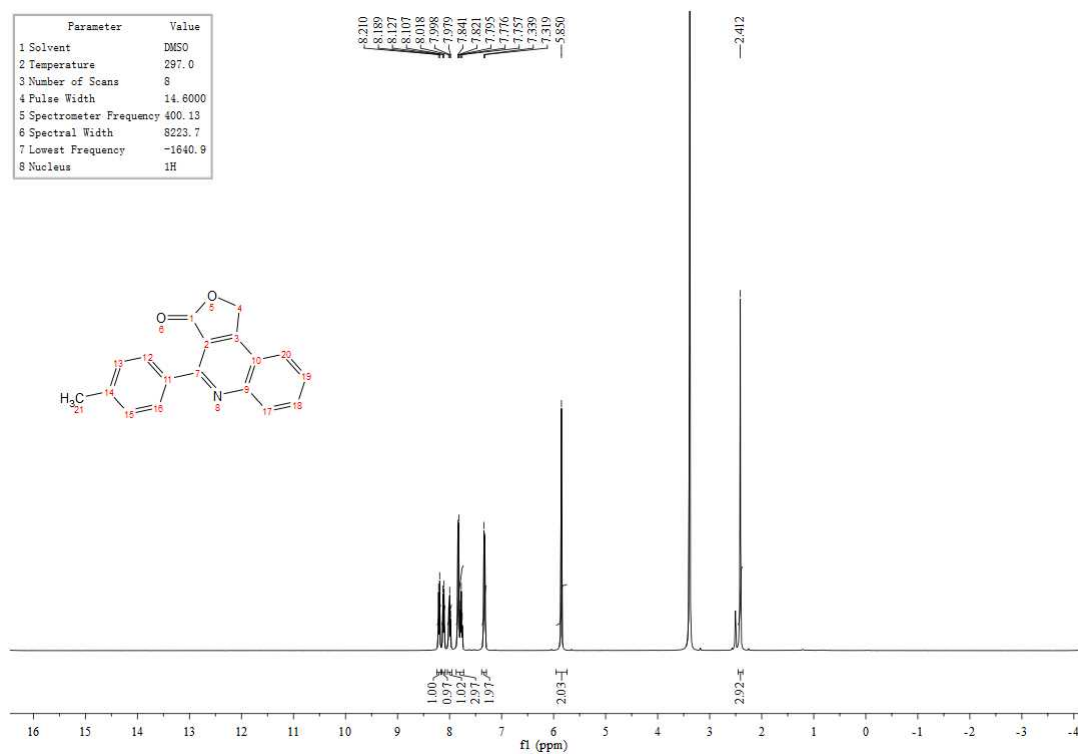

| Parameter                | Value           |
|--------------------------|-----------------|
| 1 Solvent                | DMSO            |
| 2 Temperature            | 297.6           |
| 3 Number of Scans        | 80              |
| 4 Pulse Width            | 9.0000          |
| 5 Spectrometer Frequency | 100.61          |
| 6 Spectral Width         | 28041.7         |
| 7 Lowest Frequency       | -1953.4         |
| 8 Nucleus                | <sup>13</sup> C |

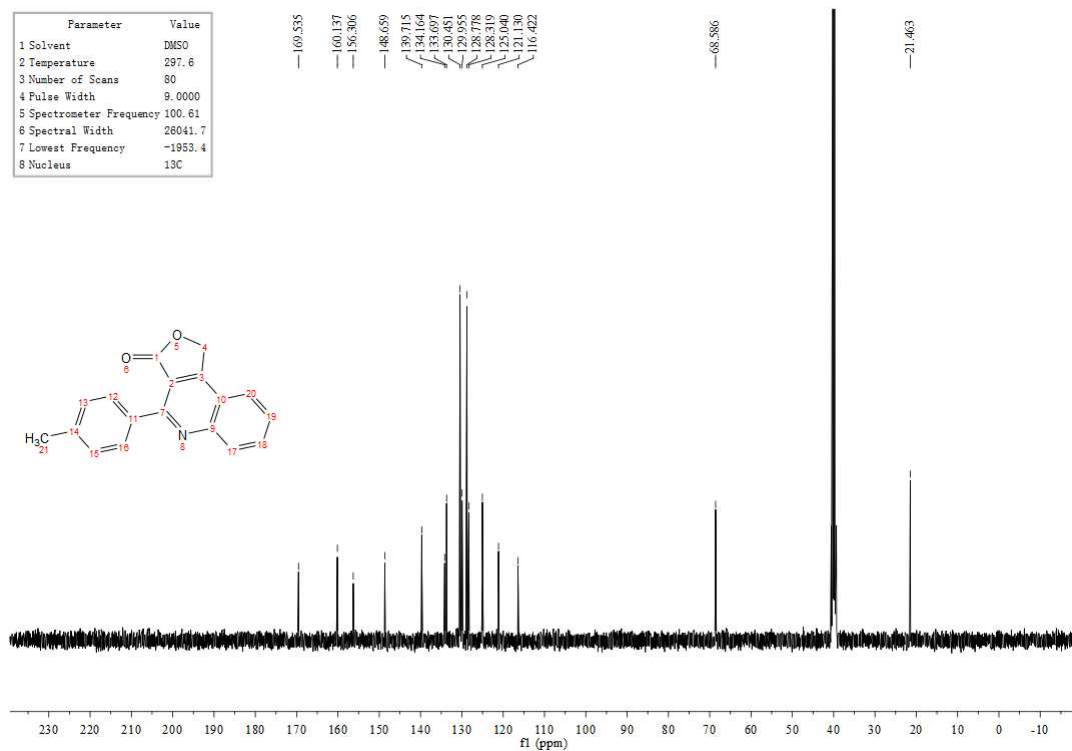

# <sup>1</sup>H NMR and <sup>13</sup>C NMR spectra of 3d

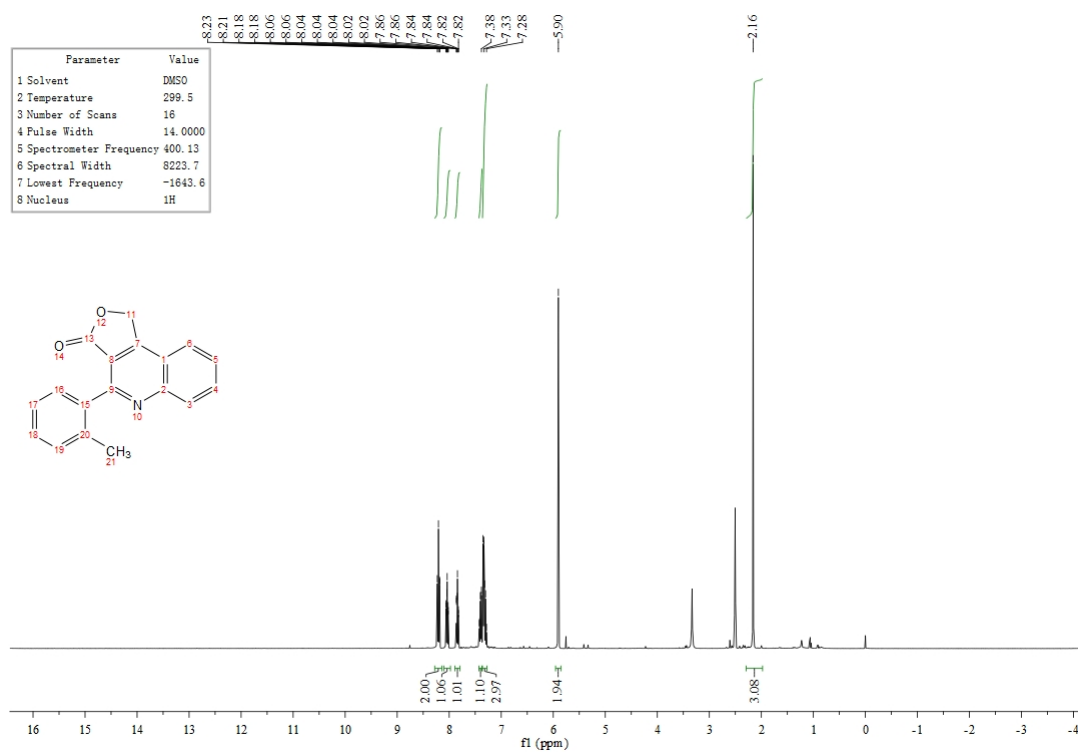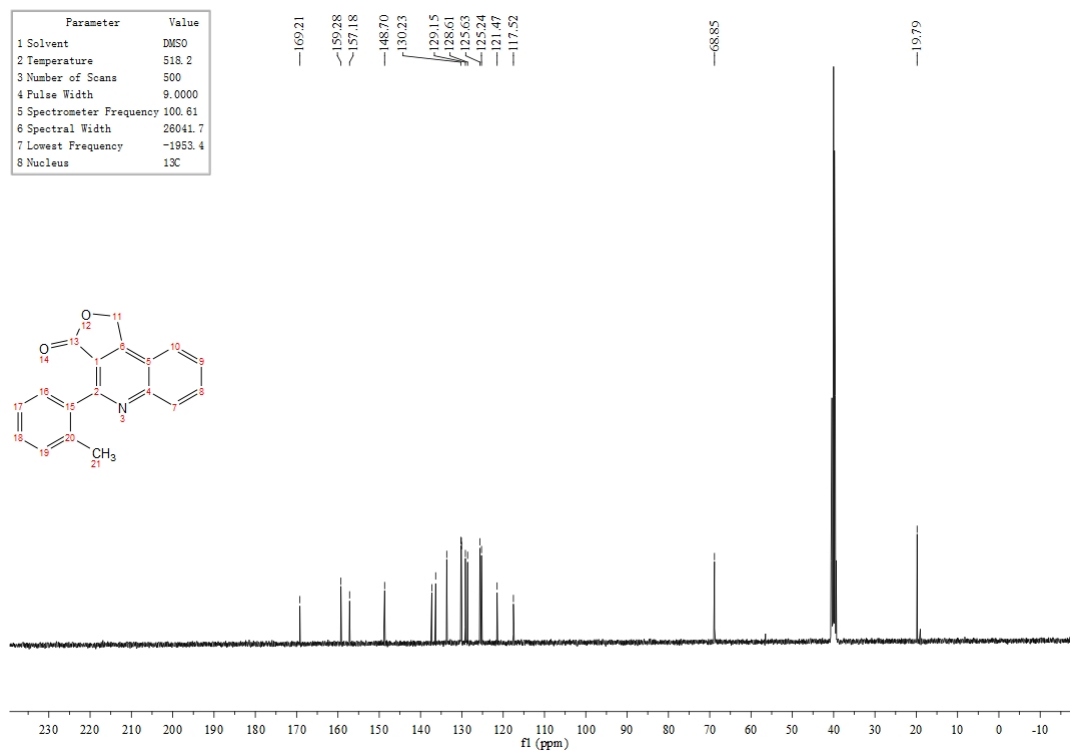

# <sup>1</sup>H NMR and <sup>13</sup>C NMR spectra of 3e

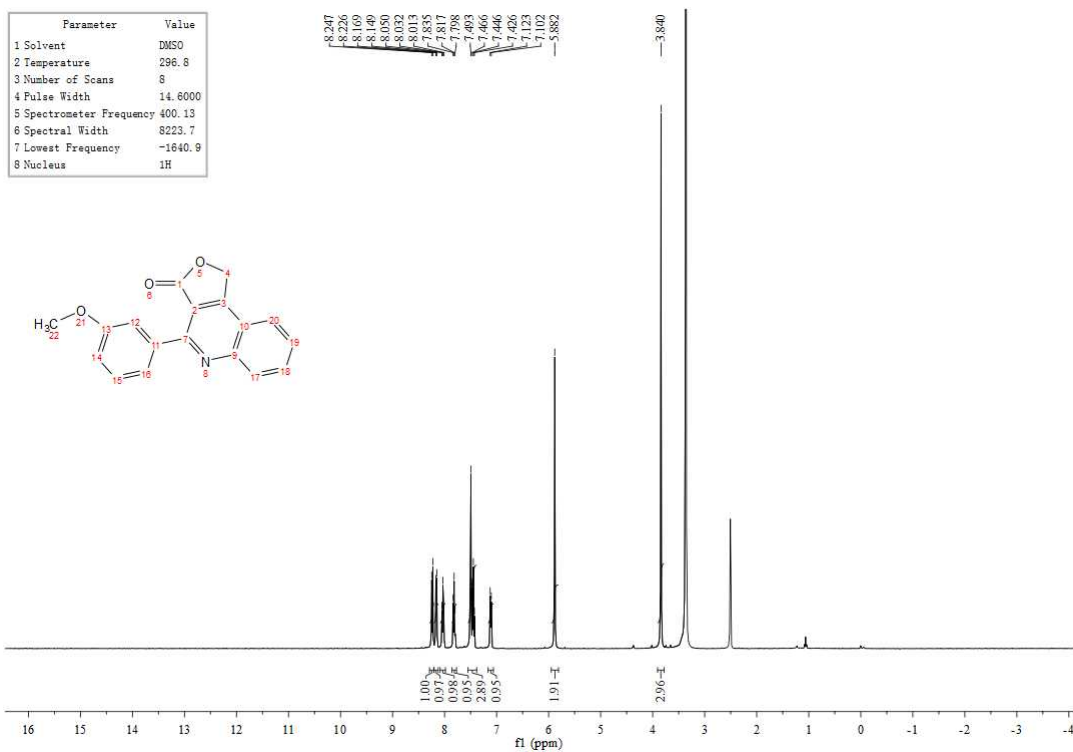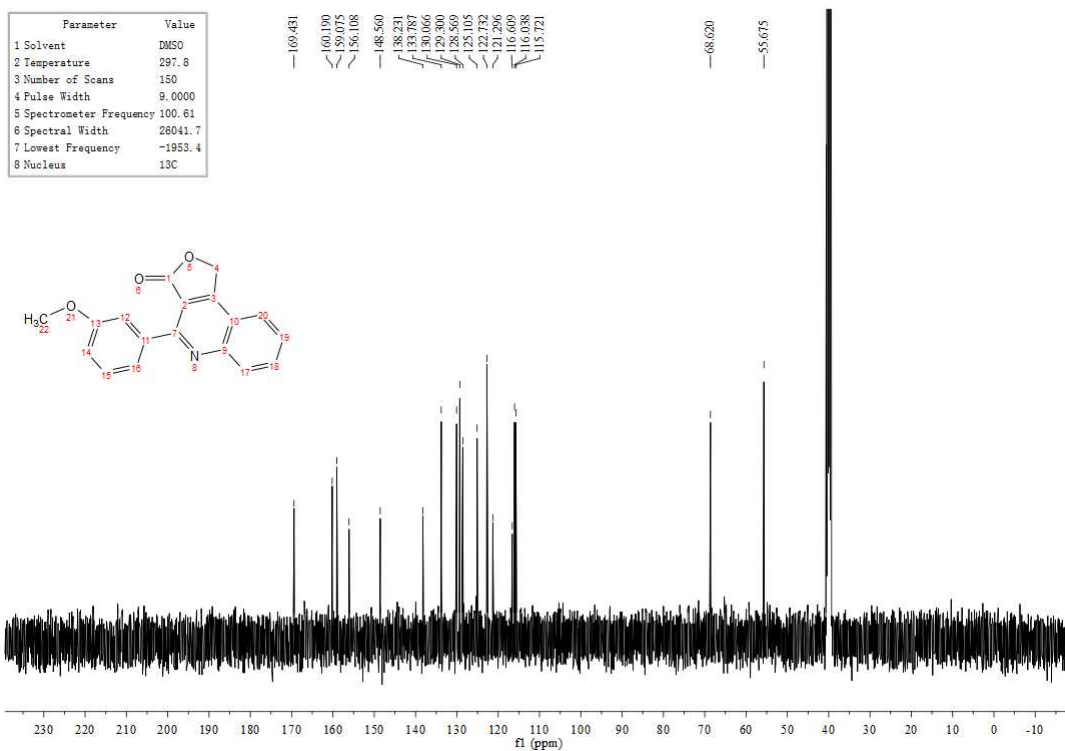



# <sup>1</sup>H NMR and <sup>13</sup>C NMR spectra of 3f

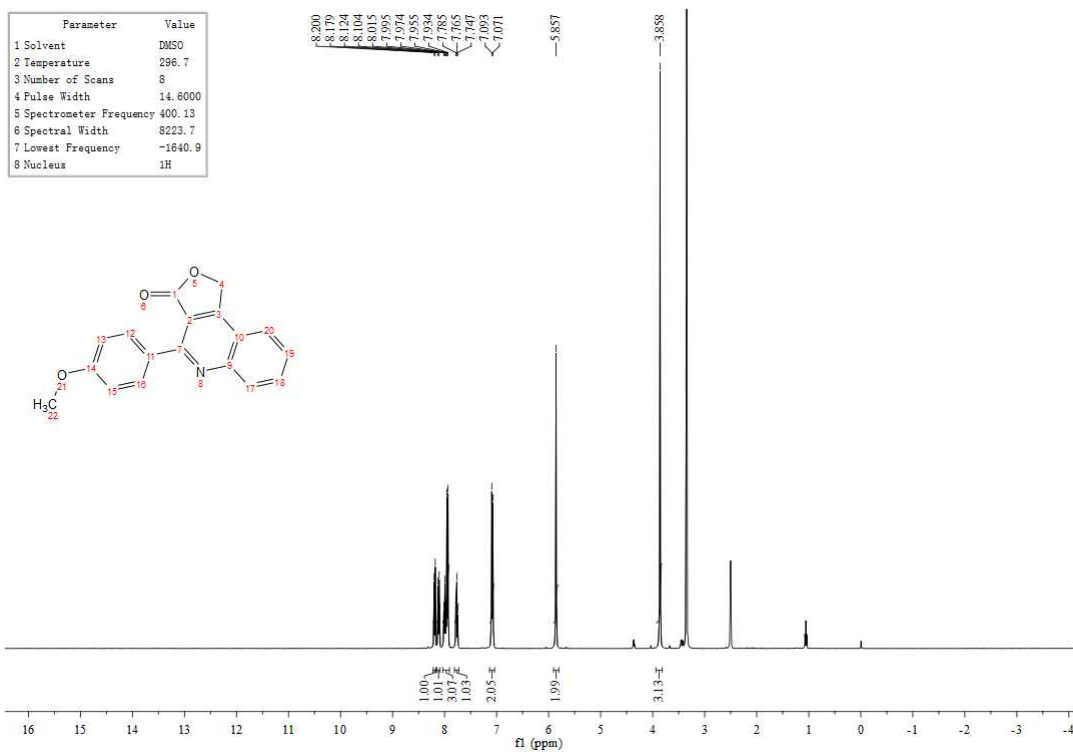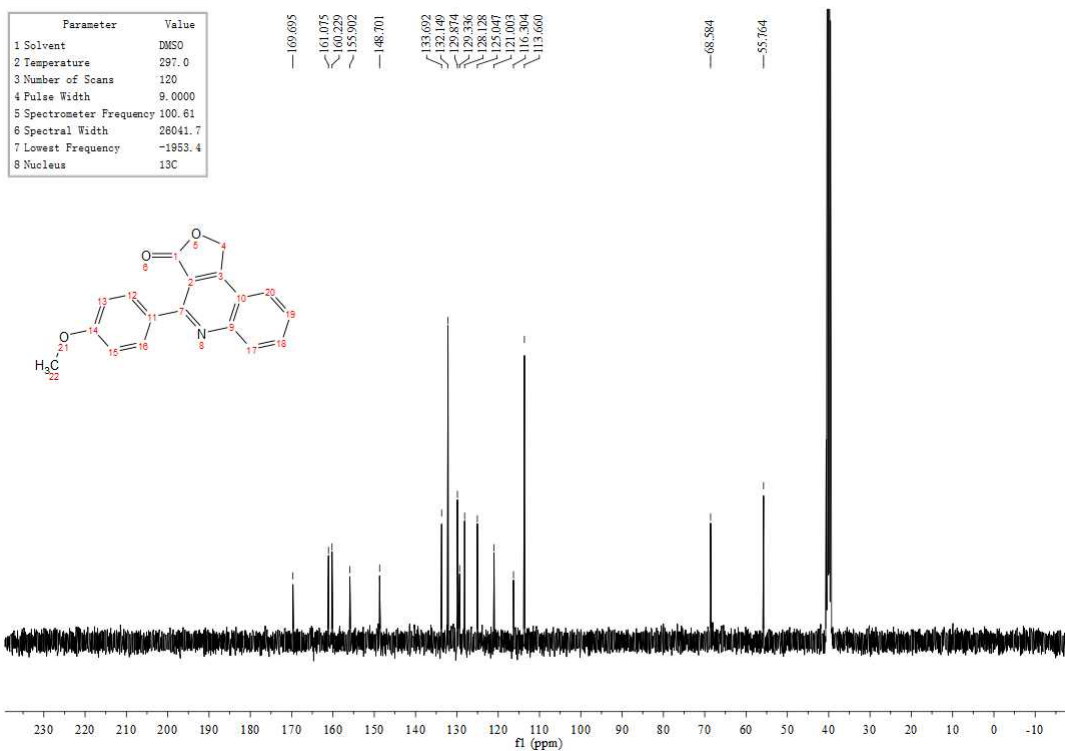

# <sup>1</sup>H NMR and <sup>13</sup>C NMR spectra of 3g

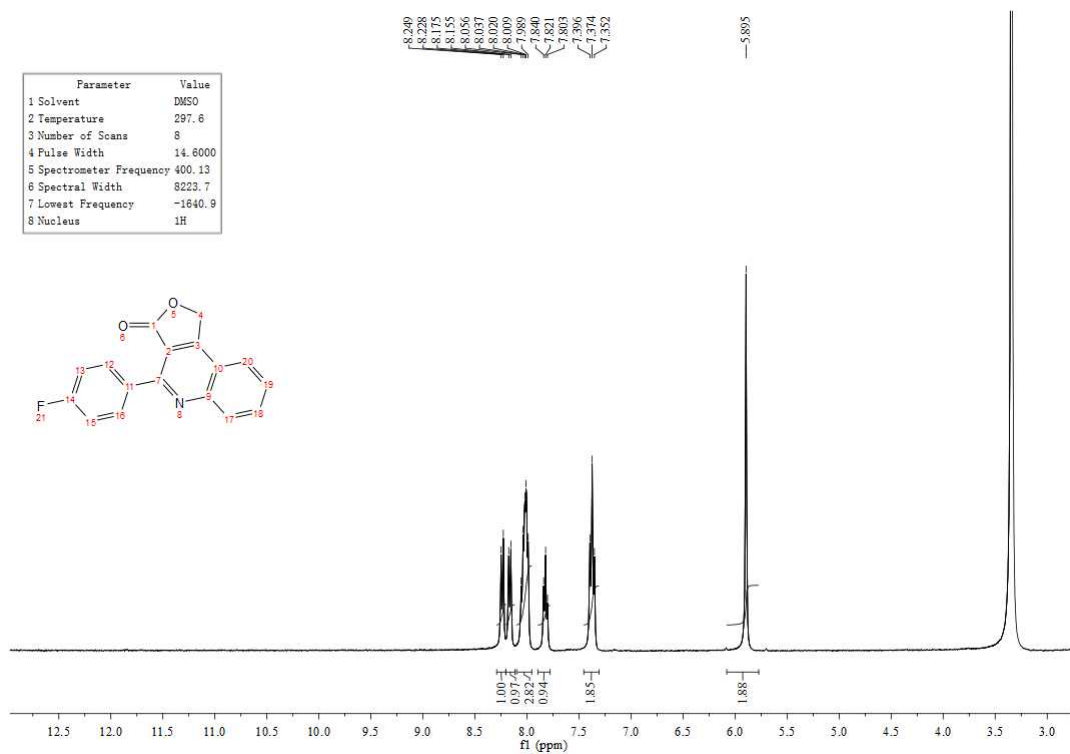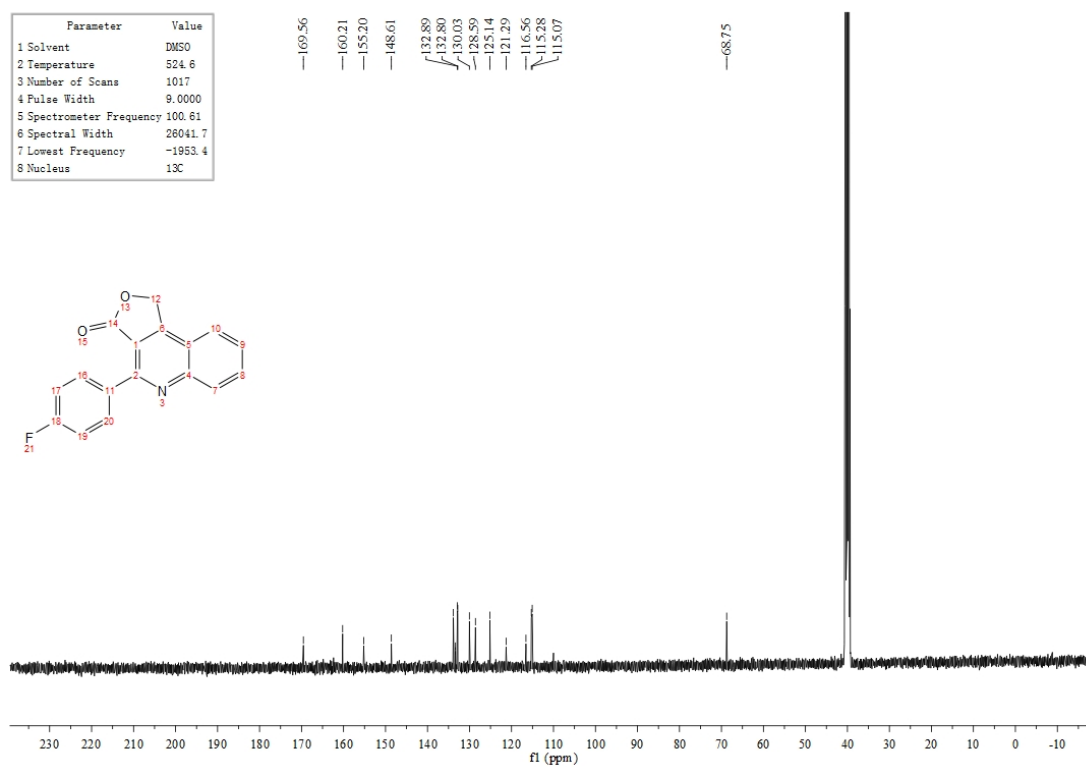

# <sup>1</sup>H NMR and <sup>13</sup>C NMR spectra of 3h

| Parameter                | Value          |
|--------------------------|----------------|
| 1 Solvent                | CDC13          |
| 2 Temperature            | 308.5          |
| 3 Number of Scans        | 8              |
| 4 Pulse Width            | 13.0000        |
| 5 Spectrometer Frequency | 400.15         |
| 6 Spectral Width         | 8223.7         |
| 7 Lowest Frequency       | -1640.8        |
| 8 Nucleus                | <sup>1</sup> H |

<sup>1</sup>H NMR peak list (ppm):  
 8.335, 8.332, 7.98, 7.94, 7.91, 7.77, 7.73, 7.68, -5.72

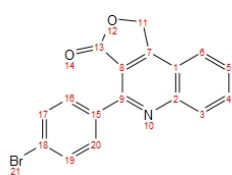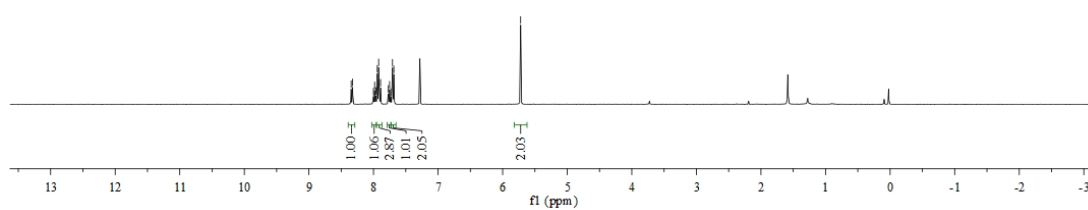

| Parameter                | Value           |
|--------------------------|-----------------|
| 1 Solvent                | DMSO            |
| 2 Temperature            | 297.9           |
| 3 Number of Scans        | 250             |
| 4 Pulse Width            | 9.0000          |
| 5 Spectrometer Frequency | 100.61          |
| 6 Spectral Width         | 26041.7         |
| 7 Lowest Frequency       | -1953.4         |
| 8 Nucleus                | <sup>13</sup> C |

<sup>13</sup>C NMR peak list (ppm):  
 169.895, 160.229, 155.112, 148.609, 136.064, 135.091, 132.844, 131.241, 130.071, 128.739, 125.179, 123.913, 121.313, 116.395, -68.816

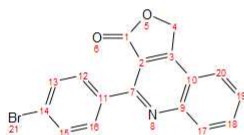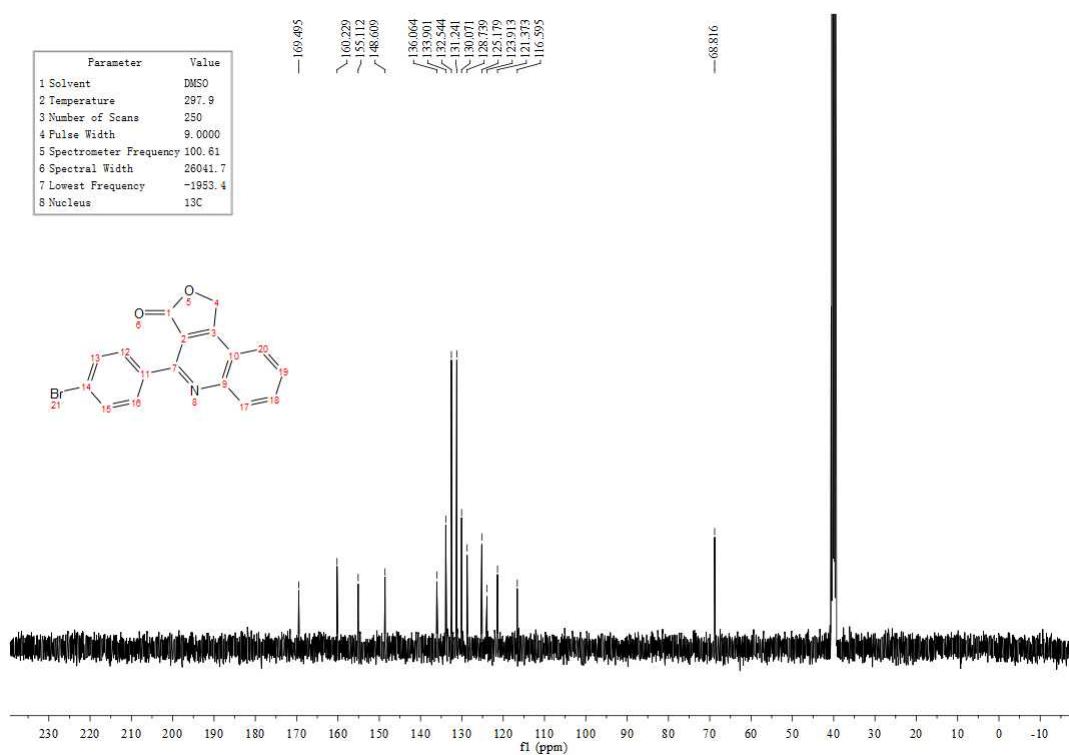

# <sup>1</sup>H NMR and <sup>13</sup>C NMR spectra of 3i

| Parameter                | Value             |
|--------------------------|-------------------|
| 1 Solvent                | CDCl <sub>3</sub> |
| 2 Temperature            | 296.7             |
| 3 Number of Scans        | 8                 |
| 4 Pulse Width            | 14.6000           |
| 5 Spectrometer Frequency | 400.13            |
| 6 Spectral Width         | 8223.7            |
| 7 Lowest Frequency       | -1640.9           |
| 8 Nucleus                | <sup>1</sup> H    |

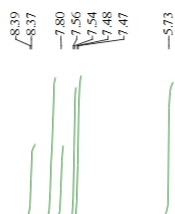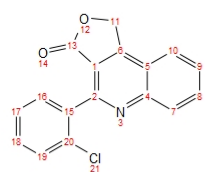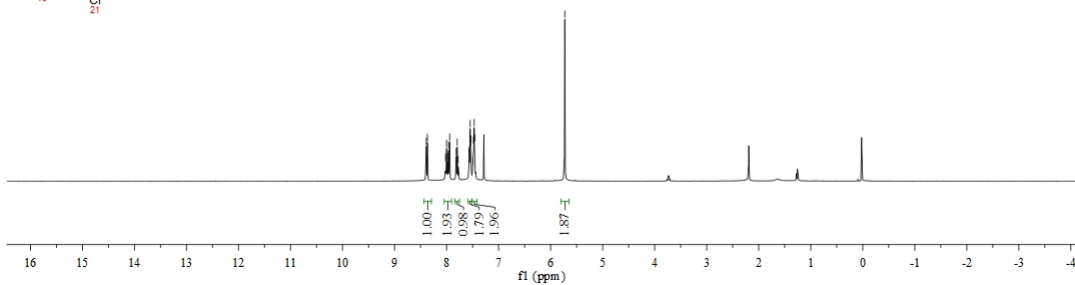

| Parameter                | Value             |
|--------------------------|-------------------|
| 1 Solvent                | CDCl <sub>3</sub> |
| 2 Temperature            | 299.8             |
| 3 Number of Scans        | 700               |
| 4 Pulse Width            | 9.0000            |
| 5 Spectrometer Frequency | 100.61            |
| 6 Spectral Width         | 26041.7           |
| 7 Lowest Frequency       | -1953.4           |
| 8 Nucleus                | <sup>13</sup> C   |

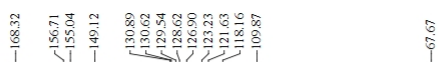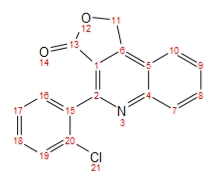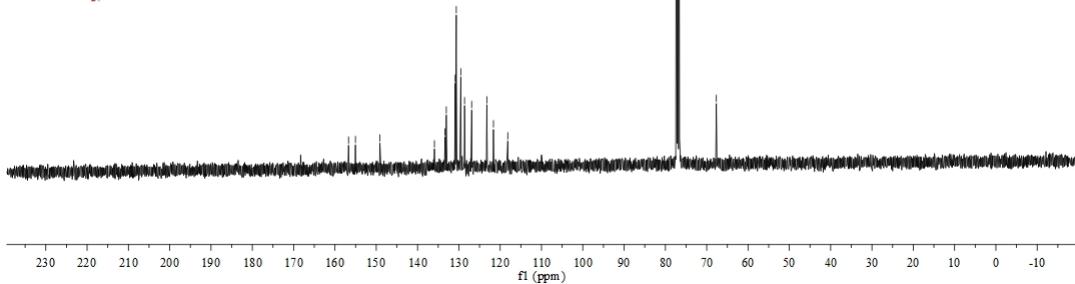

# <sup>1</sup>H NMR and <sup>13</sup>C NMR spectra of 3j

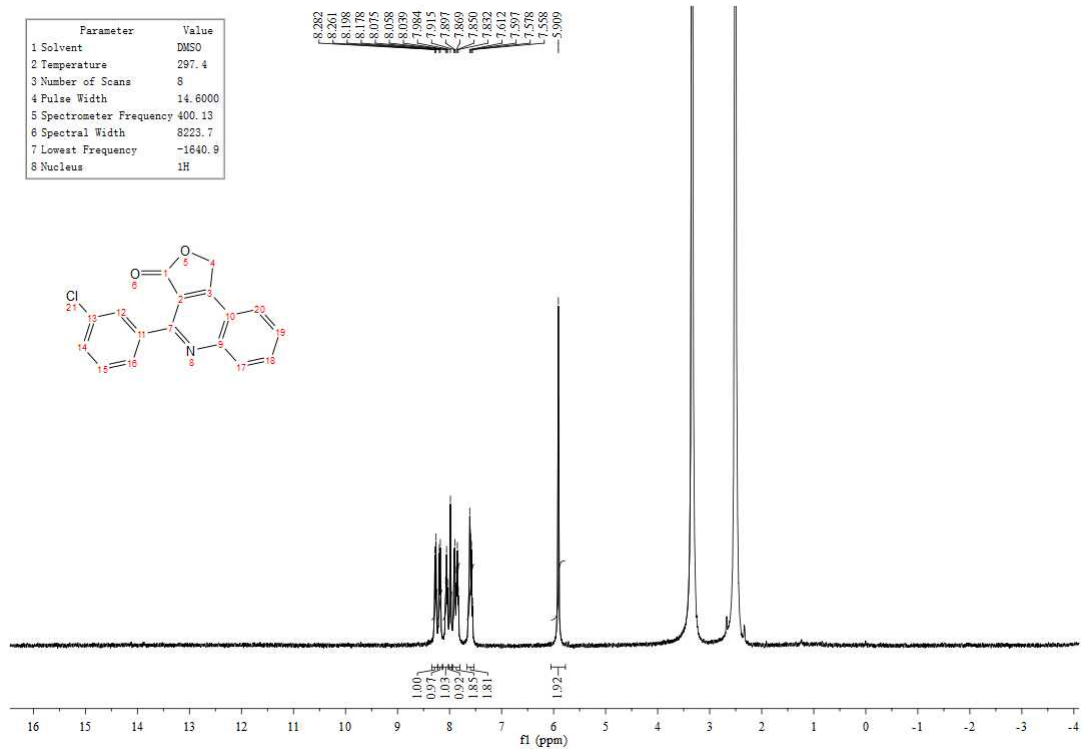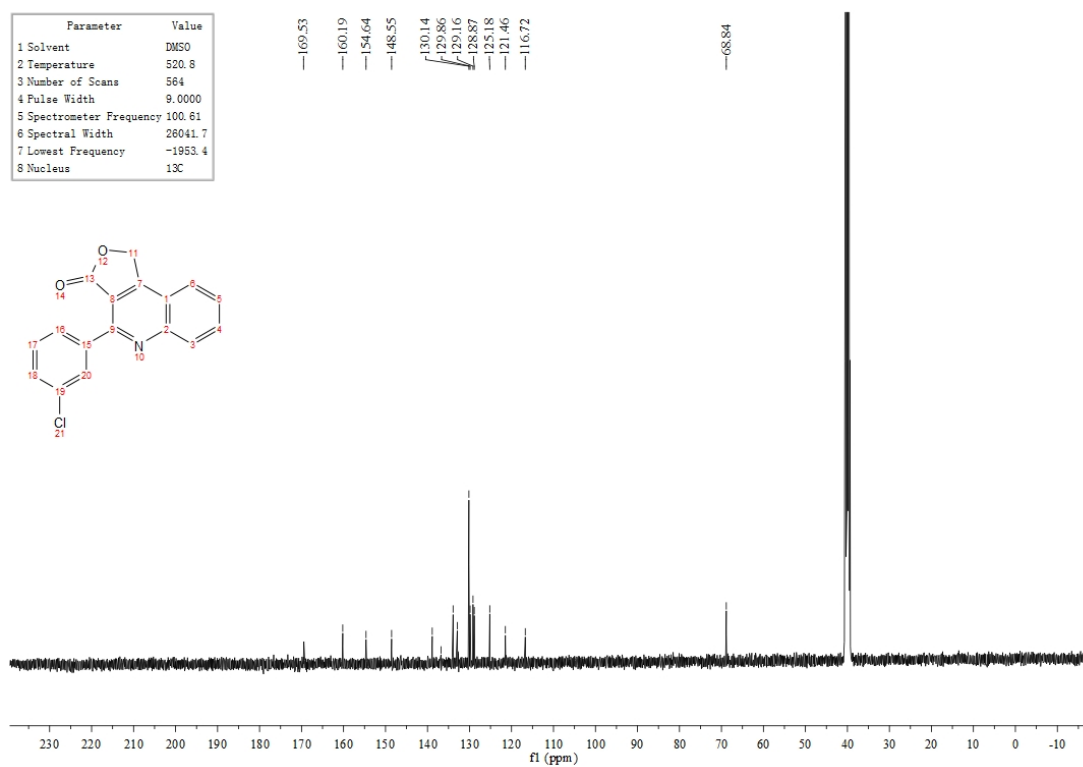

# <sup>1</sup>H NMR and <sup>13</sup>C NMR spectra of 3k

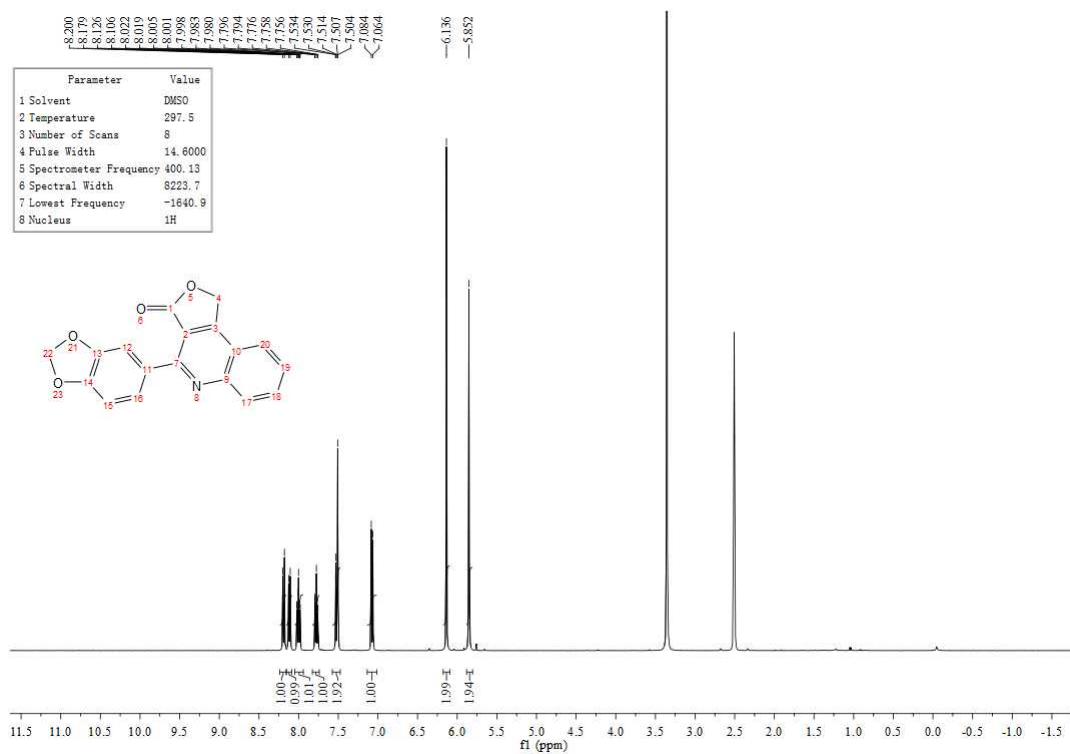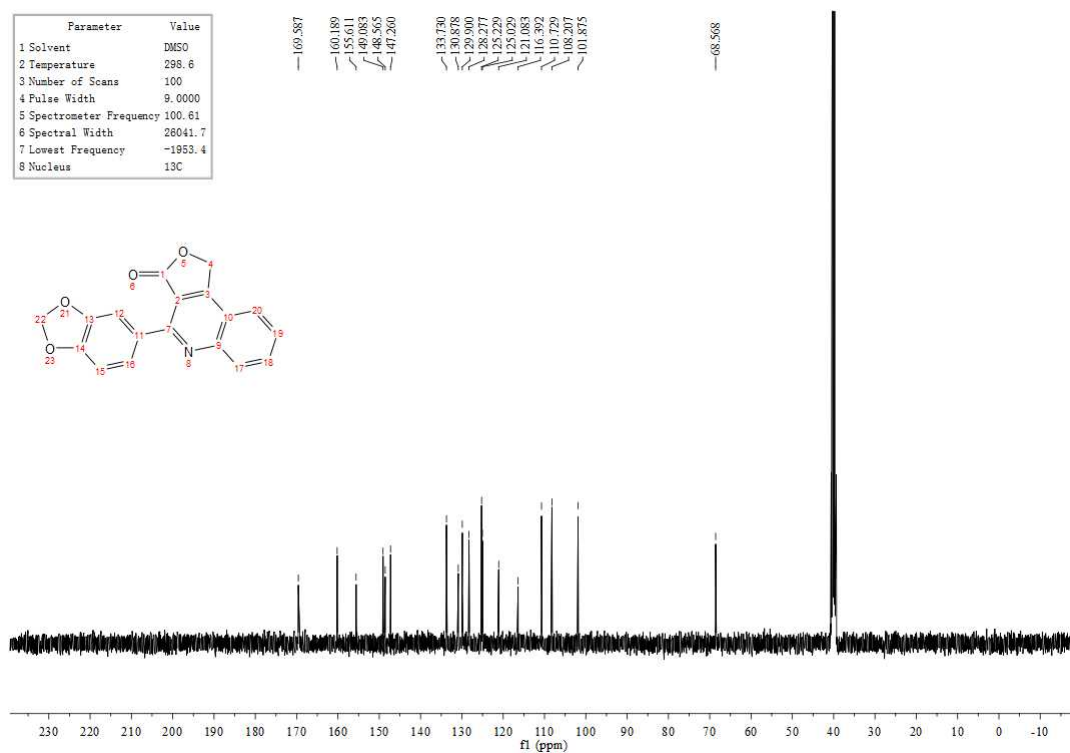

# <sup>1</sup>H NMR and <sup>13</sup>C NMR spectra of 3l

| Parameter                | Value          |
|--------------------------|----------------|
| 1 Solvent                | DMSO           |
| 2 Temperature            | 297.3          |
| 3 Number of Scans        | 8              |
| 4 Pulse Width            | 14.6000        |
| 5 Spectrometer Frequency | 400.13         |
| 6 Spectral Width         | 8223.7         |
| 7 Lowest Frequency       | -1640.9        |
| 8 Nucleus                | <sup>1</sup> H |

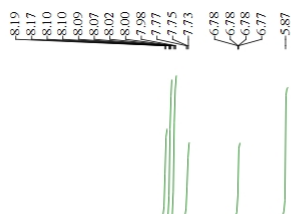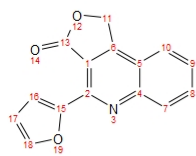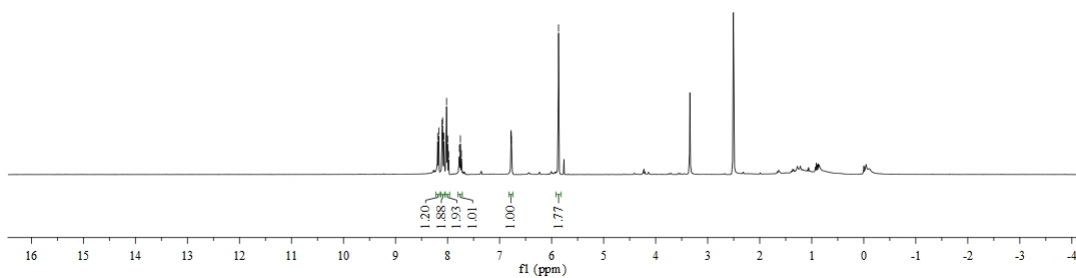

| Parameter                | Value           |
|--------------------------|-----------------|
| 1 Solvent                | DMSO            |
| 2 Temperature            | 298.6           |
| 3 Number of Scans        | 300             |
| 4 Pulse Width            | 9.0000          |
| 5 Spectrometer Frequency | 100.61          |
| 6 Spectral Width         | 26041.7         |
| 7 Lowest Frequency       | -1953.4         |
| 8 Nucleus                | <sup>13</sup> C |

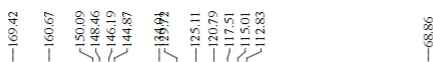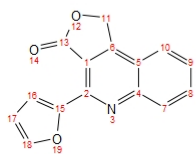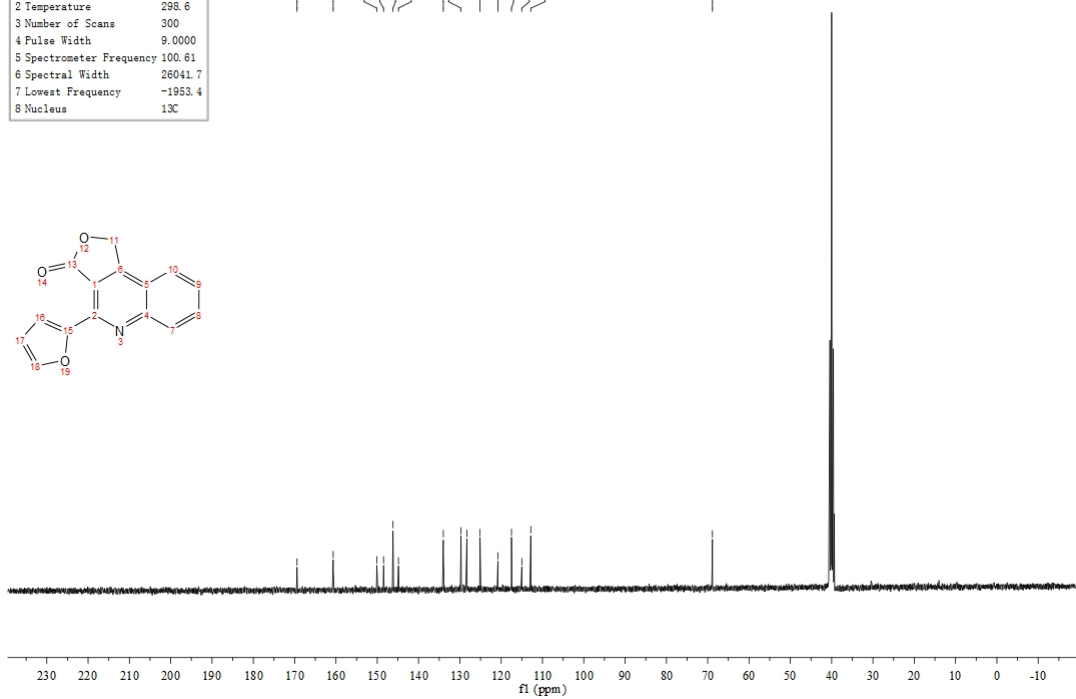

# <sup>1</sup>H NMR and <sup>13</sup>C NMR spectra of 3m

| Parameter                | Value          |
|--------------------------|----------------|
| 1 Solvent                | DMSO           |
| 2 Temperature            | 299.7          |
| 3 Number of Scans        | 16             |
| 4 Pulse Width            | 14.0000        |
| 5 Spectrometer Frequency | 400.13         |
| 6 Spectral Width         | 8223.7         |
| 7 Lowest Frequency       | -1644.1        |
| 8 Nucleus                | <sup>1</sup> H |

<sup>1</sup>H NMR peak list (ppm):  
 8.82, 8.82, 8.81, 8.81, 7.83, 7.74, 7.27, 7.27, 7.26, -5.89

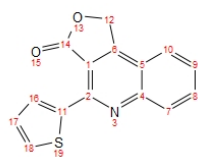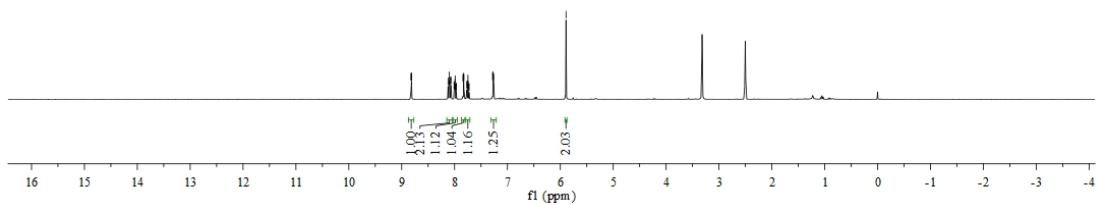

| Parameter                | Value           |
|--------------------------|-----------------|
| 1 Solvent                | DMSO            |
| 2 Temperature            | 518.2           |
| 3 Number of Scans        | 500             |
| 4 Pulse Width            | 9.0000          |
| 5 Spectrometer Frequency | 100.61          |
| 6 Spectral Width         | 26041.7         |
| 7 Lowest Frequency       | -2506.8         |
| 8 Nucleus                | <sup>13</sup> C |

<sup>13</sup>C NMR peak list (ppm):  
 164.41, 155.49, 143.79, 142.75, 137.28, 126.53, 123.55, 122.70, 119.64, 115.42, 109.84, 63.48

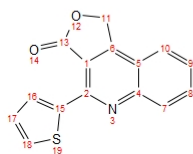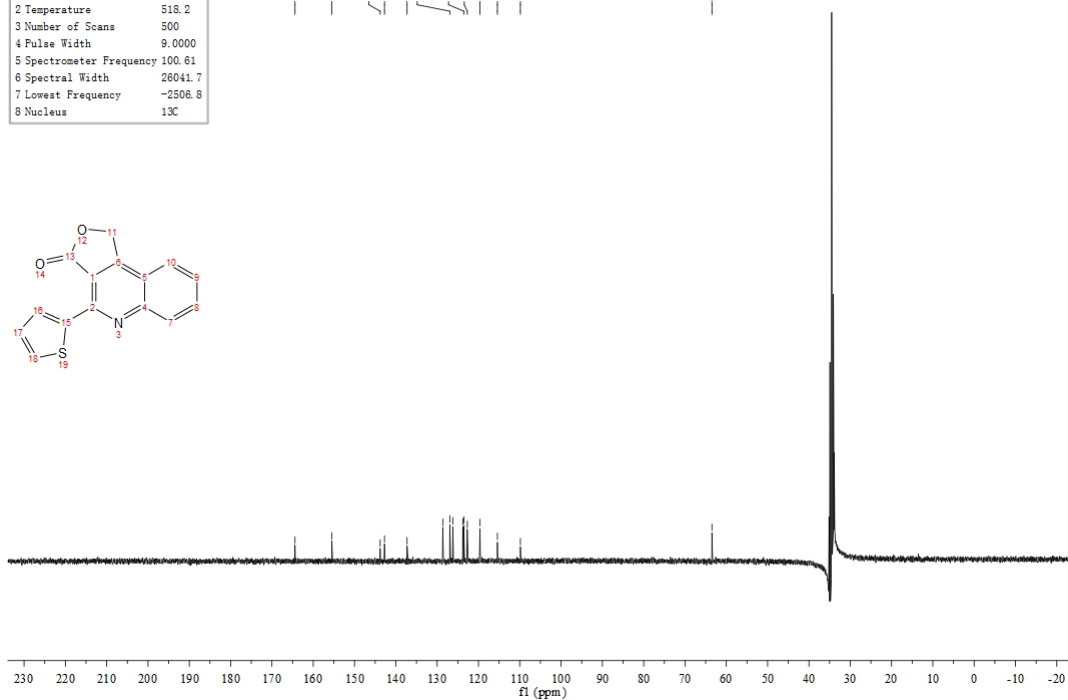



# <sup>1</sup>H NMR and <sup>13</sup>C NMR spectra of 3n

| Parameter                | Value   |
|--------------------------|---------|
| 1 Solvent                | DMSO    |
| 2 Temperature            | 307.1   |
| 3 Number of Scans        | 16      |
| 4 Pulse Width            | 13.0000 |
| 5 Spectrometer Frequency | 400.15  |
| 6 Spectral Width         | 8223.7  |
| 7 Lowest Frequency       | -1640.8 |
| 8 Nucleus                | 1H      |

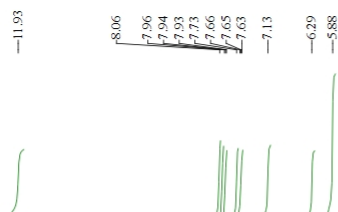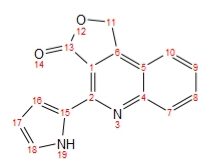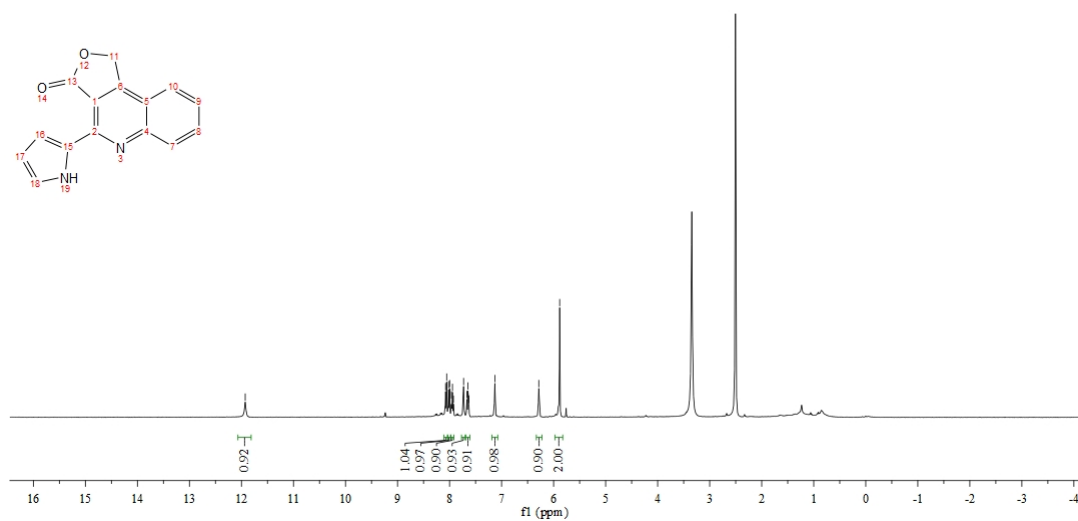

| Parameter                | Value   |
|--------------------------|---------|
| 1 Solvent                | DMSO    |
| 2 Temperature            | 307.2   |
| 3 Number of Scans        | 450     |
| 4 Pulse Width            | 9.5000  |
| 5 Spectrometer Frequency | 100.62  |
| 6 Spectral Width         | 23409.1 |
| 7 Lowest Frequency       | -3136.6 |
| 8 Nucleus                | 13C     |

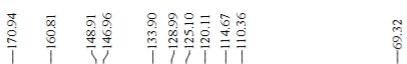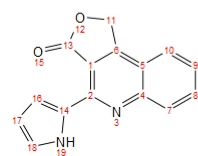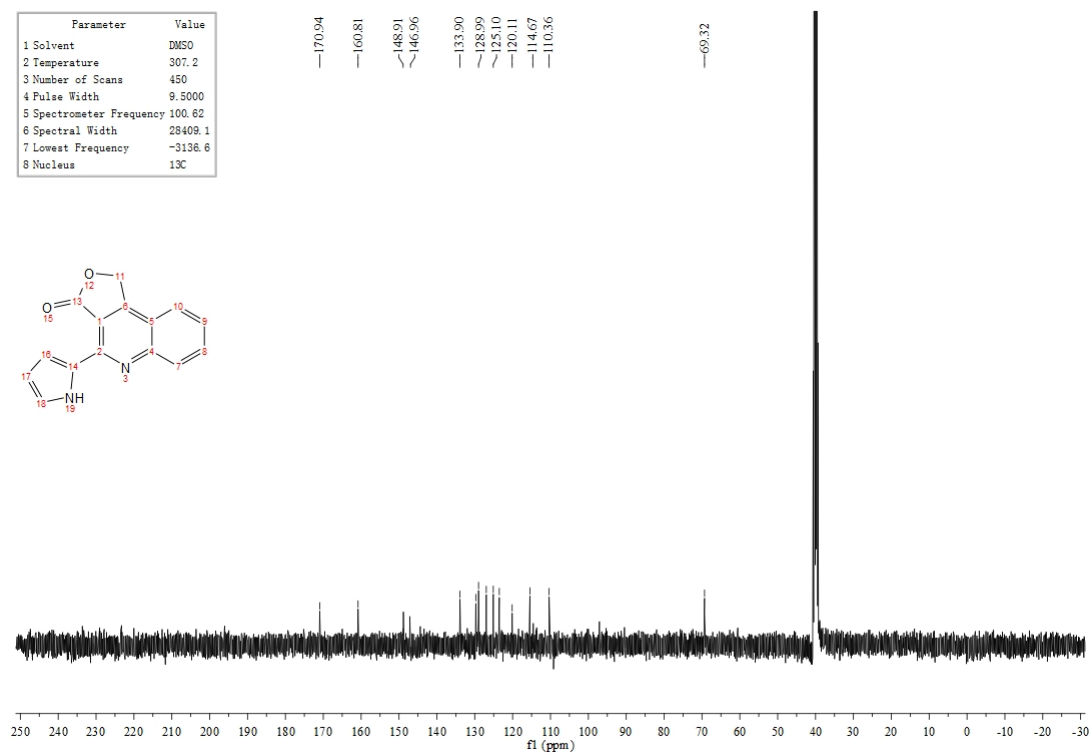

# <sup>1</sup>H NMR and <sup>13</sup>C NMR spectra of 3o

| Parameter                | Value          |
|--------------------------|----------------|
| 1 Solvent                | DMSO           |
| 2 Temperature            | 307.1          |
| 3 Number of Scans        | 16             |
| 4 Pulse Width            | 13.0000        |
| 5 Spectrometer Frequency | 400.15         |
| 6 Spectral Width         | 8223.7         |
| 7 Lowest Frequency       | -1640.8        |
| 8 Nucleus                | <sup>1</sup> H |

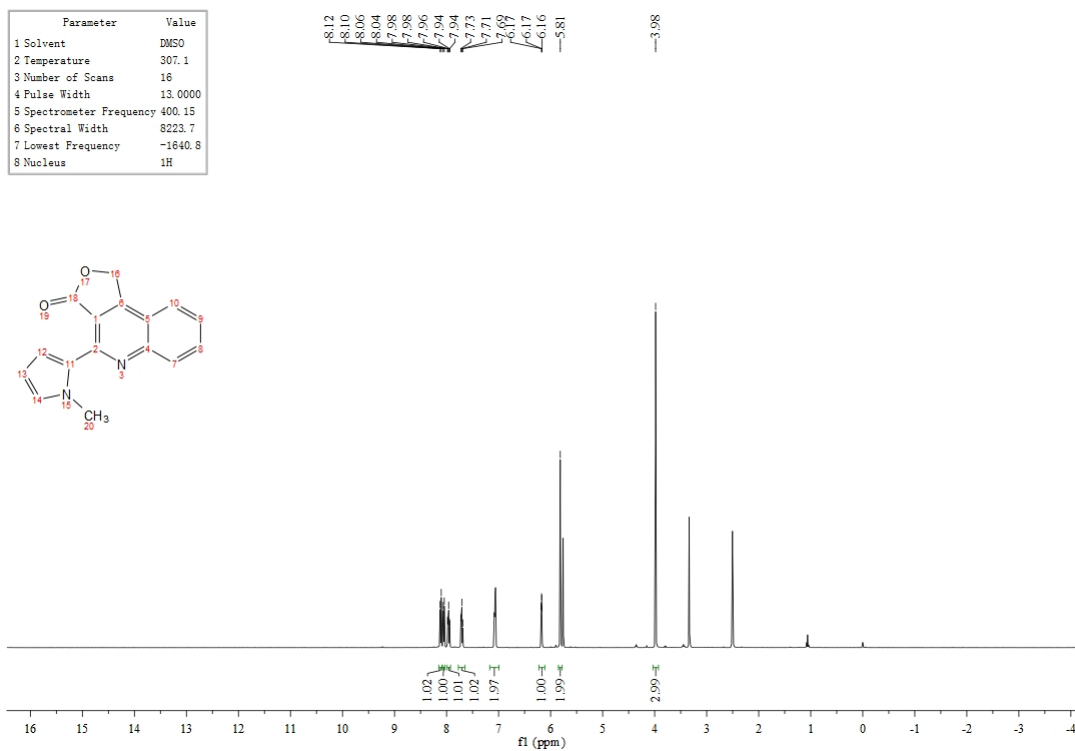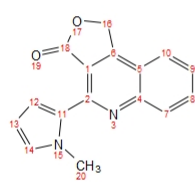

| Parameter                | Value           |
|--------------------------|-----------------|
| 1 Solvent                | DMSO            |
| 2 Temperature            | 307.1           |
| 3 Number of Scans        | 400             |
| 4 Pulse Width            | 9.5000          |
| 5 Spectrometer Frequency | 100.62          |
| 6 Spectral Width         | 28409.1         |
| 7 Lowest Frequency       | -3136.6         |
| 8 Nucleus                | <sup>13</sup> C |

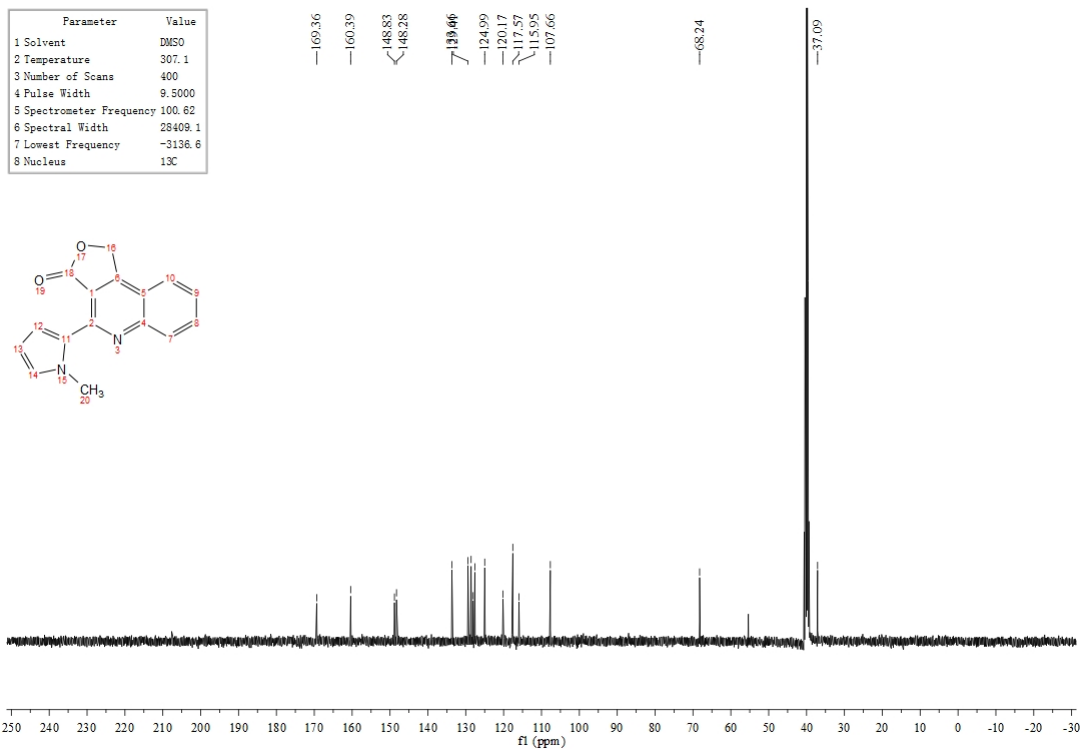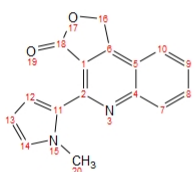

# <sup>1</sup>H NMR and <sup>13</sup>C NMR spectra of 3p

| Parameter                | Value             |
|--------------------------|-------------------|
| 1 Solvent                | CDCl <sub>3</sub> |
| 2 Temperature            | 297.4             |
| 3 Number of Scans        | 8                 |
| 4 Pulse Width            | 14.0000           |
| 5 Spectrometer Frequency | 400.13            |
| 6 Spectral Width         | 8223.7            |
| 7 Lowest Frequency       | -1650.2           |
| 8 Nucleus                | <sup>1</sup> H    |

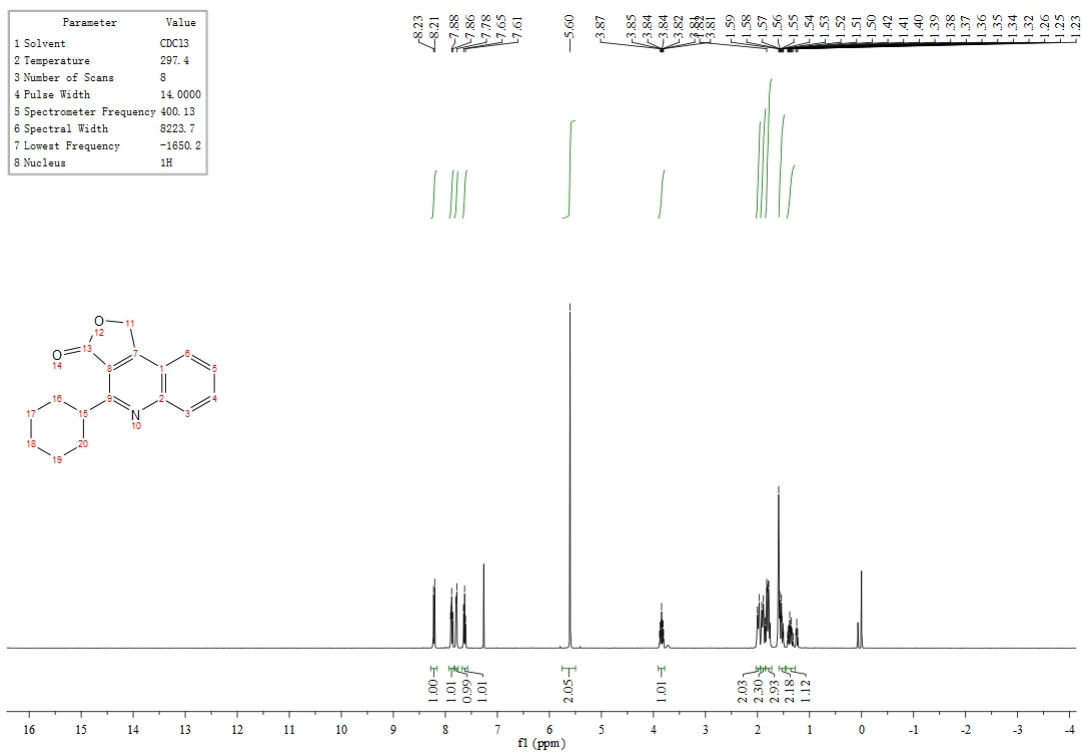

| Parameter                | Value             |
|--------------------------|-------------------|
| 1 Solvent                | CDCl <sub>3</sub> |
| 2 Temperature            | 299.4             |
| 3 Number of Scans        | 500               |
| 4 Pulse Width            | 9.0000            |
| 5 Spectrometer Frequency | 100.61            |
| 6 Spectral Width         | 26041.7           |
| 7 Lowest Frequency       | -1953.4           |
| 8 Nucleus                | <sup>13</sup> C   |

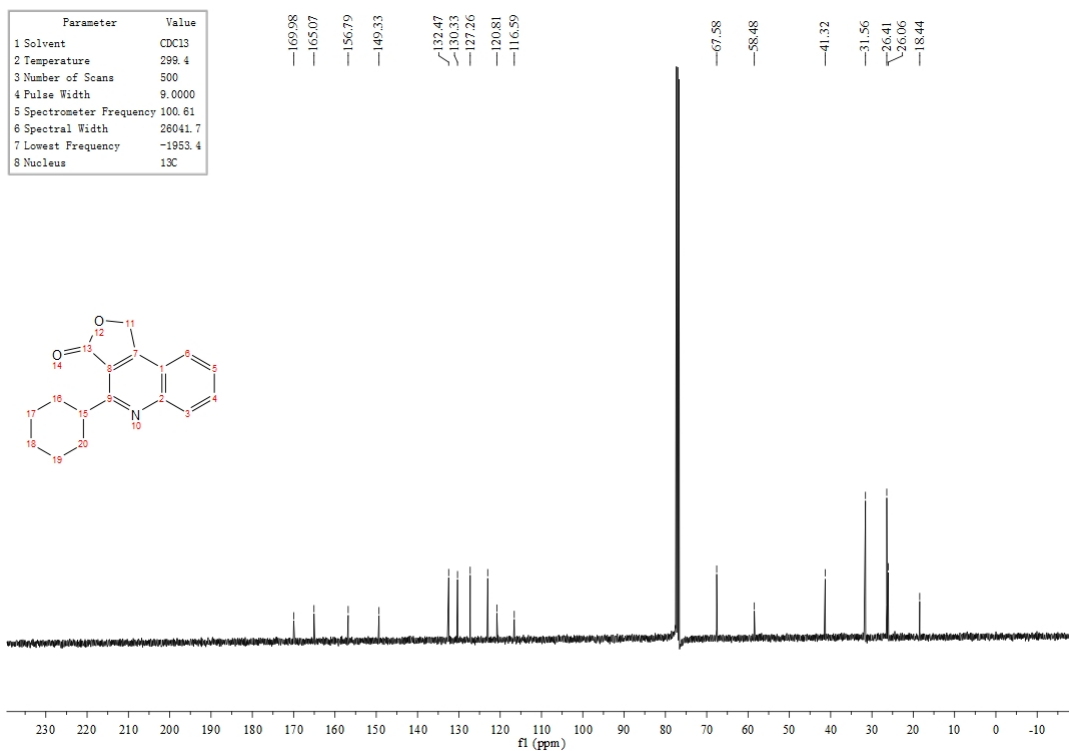

# <sup>1</sup>H NMR and <sup>13</sup>C NMR spectra of 3q

| Parameter                | Value             |
|--------------------------|-------------------|
| 1 Solvent                | CDCl <sub>3</sub> |
| 2 Temperature            | 308.7             |
| 3 Number of Scans        | 10                |
| 4 Pulse Width            | 13.0000           |
| 5 Spectrometer Frequency | 400.15            |
| 6 Spectral Width         | 8223.7            |
| 7 Lowest Frequency       | -1640.8           |
| 8 Nucleus                | <sup>1</sup> H    |

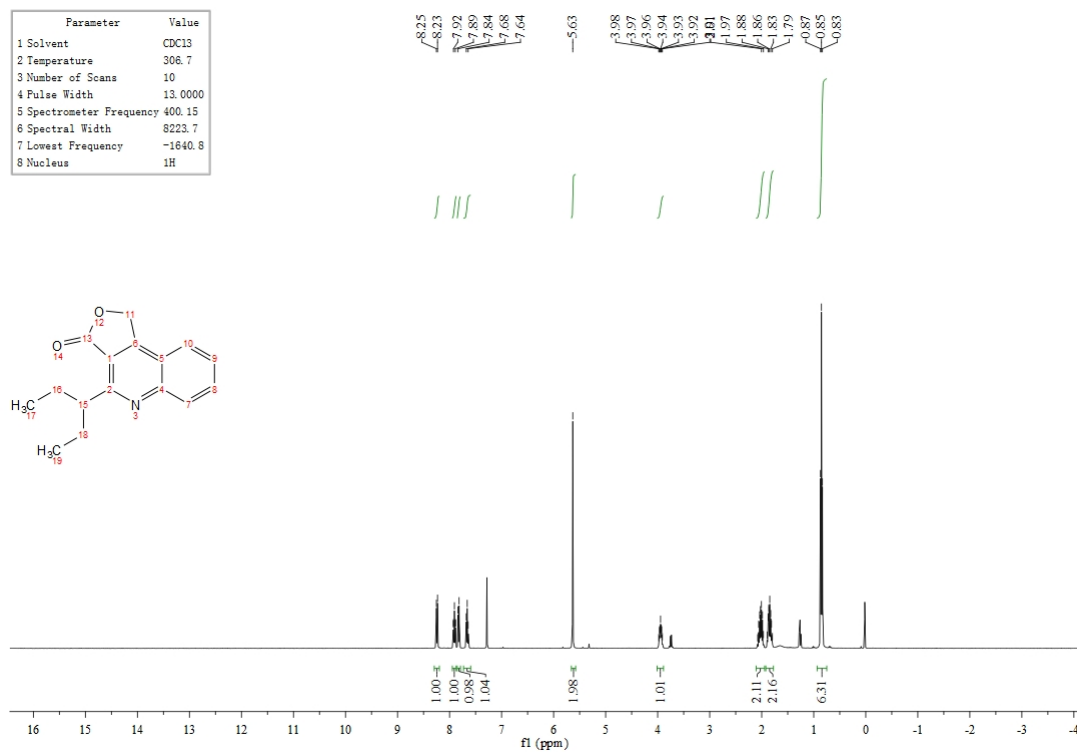

| Parameter                | Value             |
|--------------------------|-------------------|
| 1 Solvent                | CDCl <sub>3</sub> |
| 2 Temperature            | 307.1             |
| 3 Number of Scans        | 600               |
| 4 Pulse Width            | 9.5000            |
| 5 Spectrometer Frequency | 100.62            |
| 6 Spectral Width         | 23409.1           |
| 7 Lowest Frequency       | -3136.6           |
| 8 Nucleus                | <sup>13</sup> C   |

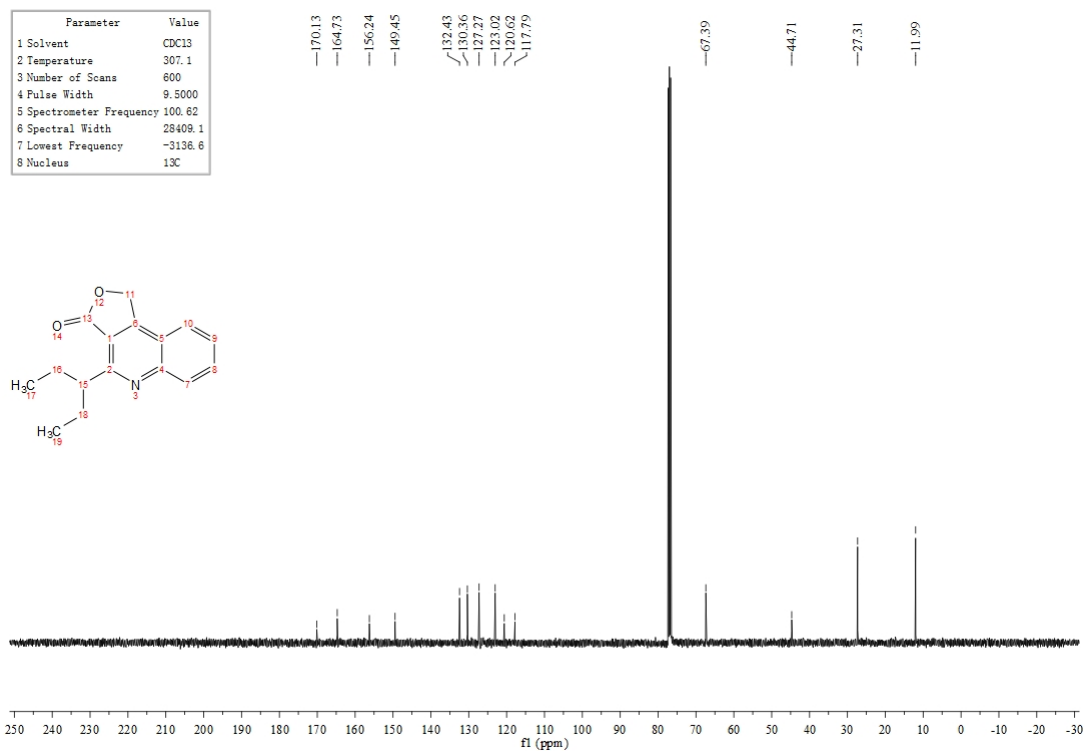

# <sup>1</sup>H NMR and <sup>13</sup>C NMR spectra of 3r'

| Parameter                | Value             |
|--------------------------|-------------------|
| 1 Solvent                | CDCl <sub>3</sub> |
| 2 Temperature            | 294.3             |
| 3 Number of Scans        | 8                 |
| 4 Pulse Width            | 14.6000           |
| 5 Spectrometer Frequency | 400.13            |
| 6 Spectral Width         | 8223.7            |
| 7 Lowest Frequency       | -1640.9           |
| 8 Nucleus                | <sup>1</sup> H    |

8.26  
8.24  
7.95  
7.93  
7.91  
7.84  
7.82  
7.70  
7.68  
7.67  
7.41  
7.40  
7.33  
7.32  
7.30  
7.28  
7.23  
7.22  
7.20  
-5.64  
3.71  
3.69  
3.67  
3.20  
3.18  
3.17  
3.15

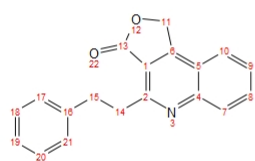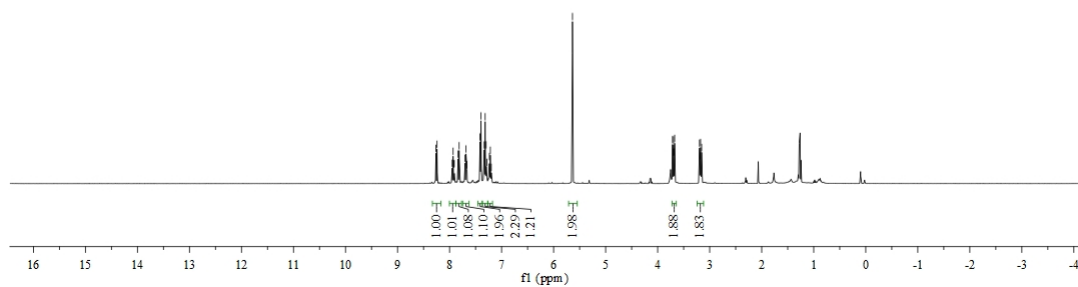

| Parameter                | Value             |
|--------------------------|-------------------|
| 1 Solvent                | CDCl <sub>3</sub> |
| 2 Temperature            | 295.6             |
| 3 Number of Scans        | 75                |
| 4 Pulse Width            | 9.0000            |
| 5 Spectrometer Frequency | 100.61            |
| 6 Spectral Width         | 28041.7           |
| 7 Lowest Frequency       | -1953.4           |
| 8 Nucleus                | <sup>13</sup> C   |

169.90  
160.07  
156.93  
149.19  
138.74  
138.74  
126.03  
124.76  
123.19  
121.08  
117.30  
110.00  
67.88  
36.85  
35.08

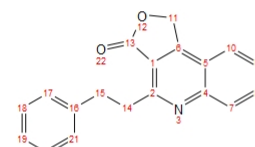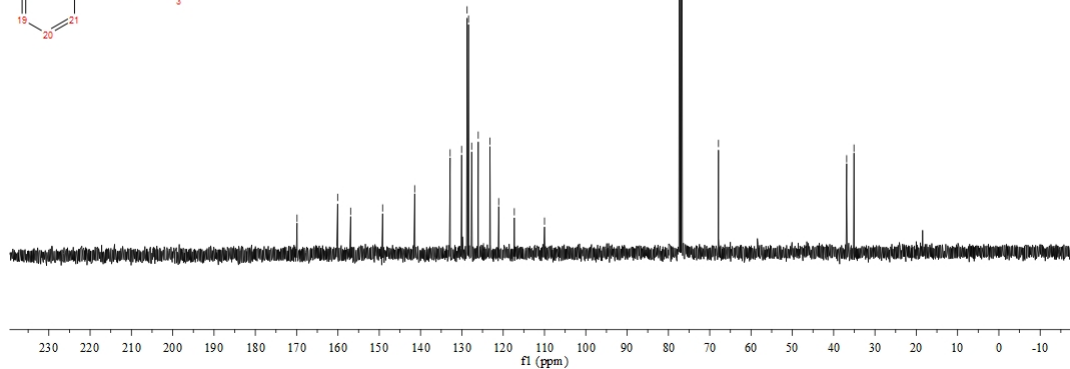

# <sup>1</sup>H NMR and <sup>13</sup>C NMR spectra of 3s'

| Parameter                | Value             |
|--------------------------|-------------------|
| 1 Solvent                | CDCl <sub>3</sub> |
| 2 Temperature            | 307.5             |
| 3 Number of Scans        | 16                |
| 4 Pulse Width            | 13.0000           |
| 5 Spectrometer Frequency | 400.15            |
| 6 Spectral Width         | 8223.7            |
| 7 Lowest Frequency       | -1640.8           |
| 8 Nucleus                | <sup>1</sup> H    |

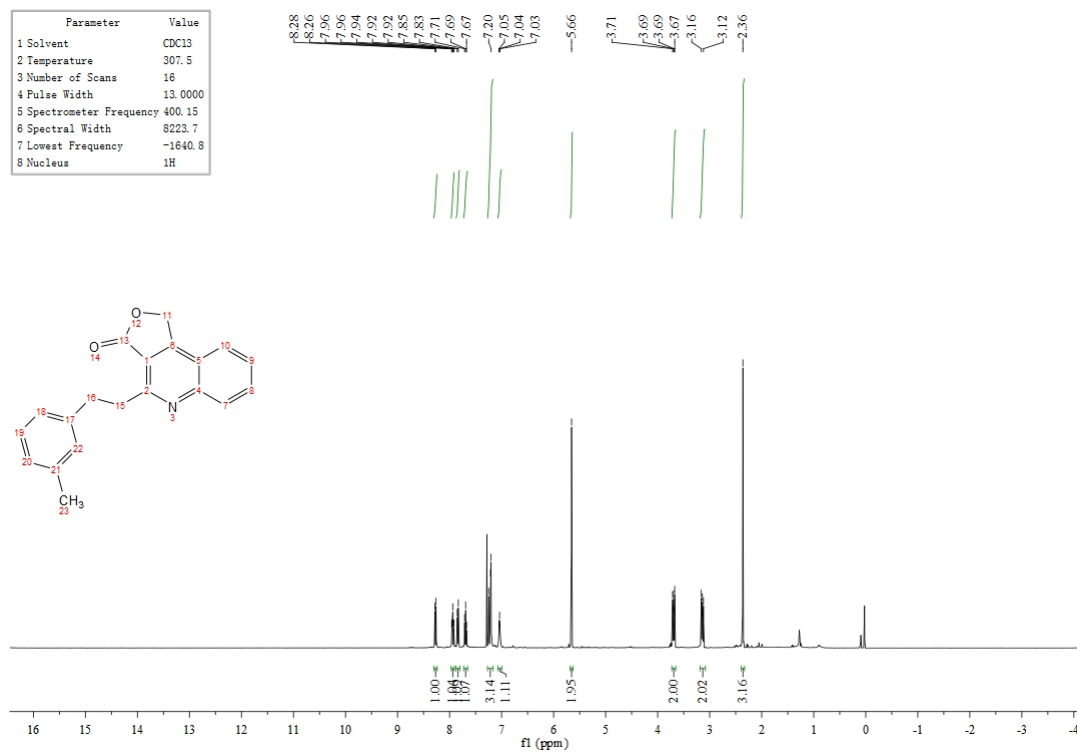

| Parameter                | Value             |
|--------------------------|-------------------|
| 1 Solvent                | CDCl <sub>3</sub> |
| 2 Temperature            | 307.7             |
| 3 Number of Scans        | 200               |
| 4 Pulse Width            | 9.5000            |
| 5 Spectrometer Frequency | 100.62            |
| 6 Spectral Width         | 23409.1           |
| 7 Lowest Frequency       | -3136.6           |
| 8 Nucleus                | <sup>13</sup> C   |

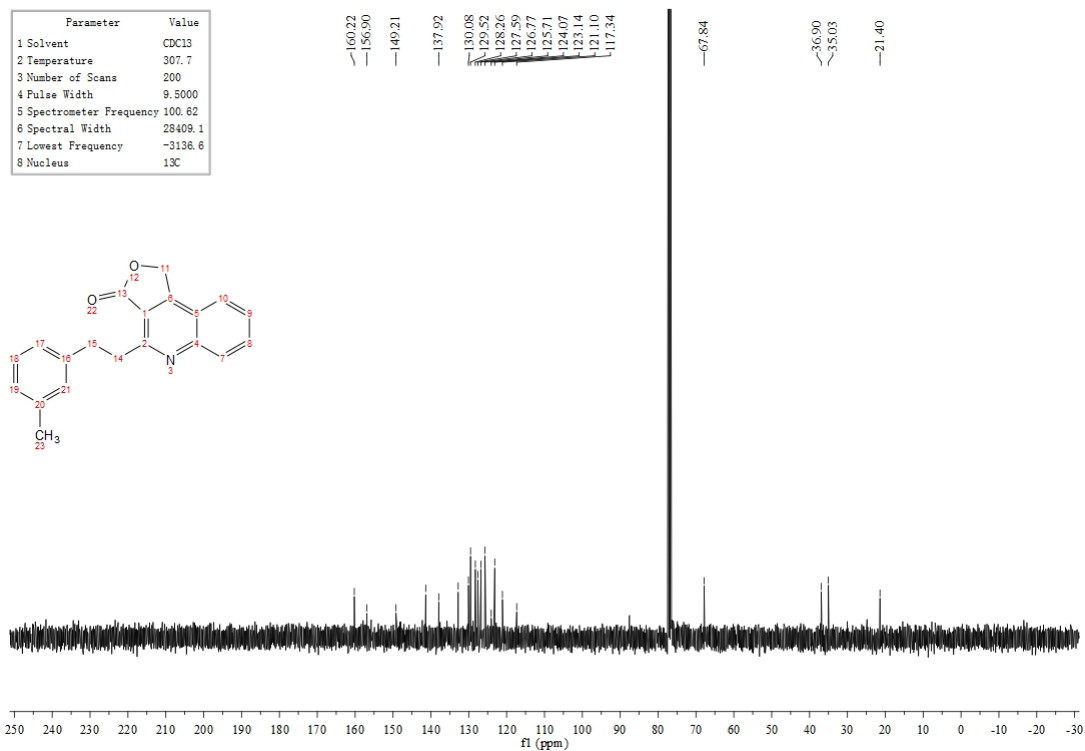

# <sup>1</sup>H NMR and <sup>13</sup>C NMR spectra of 3t'

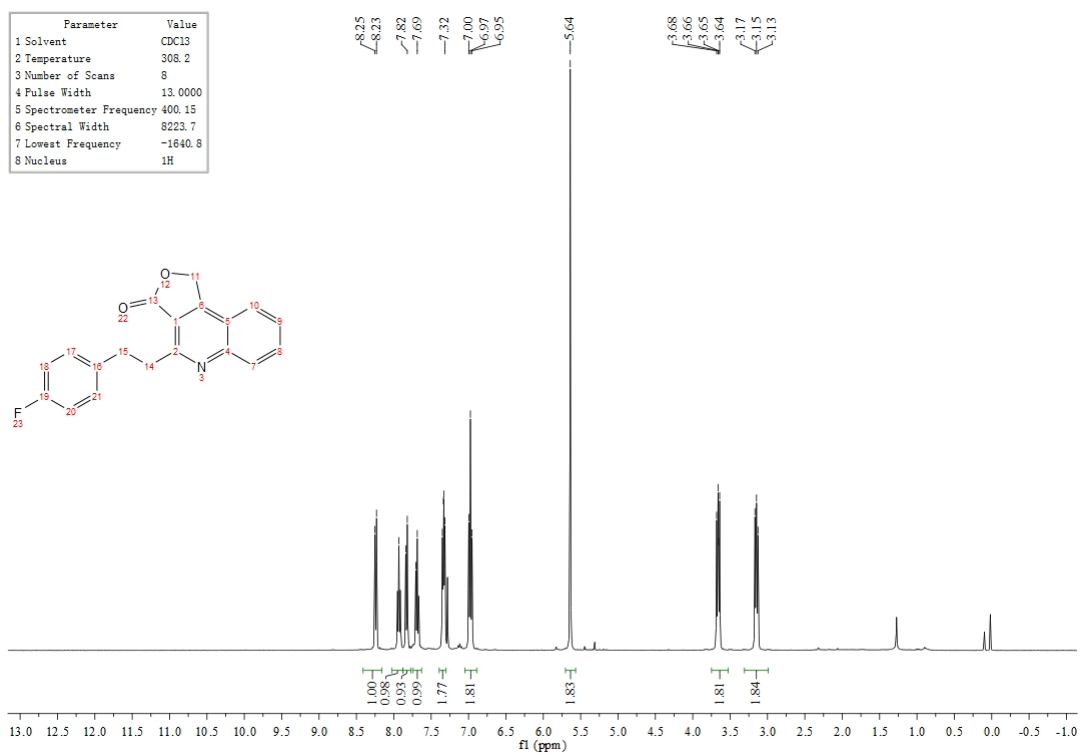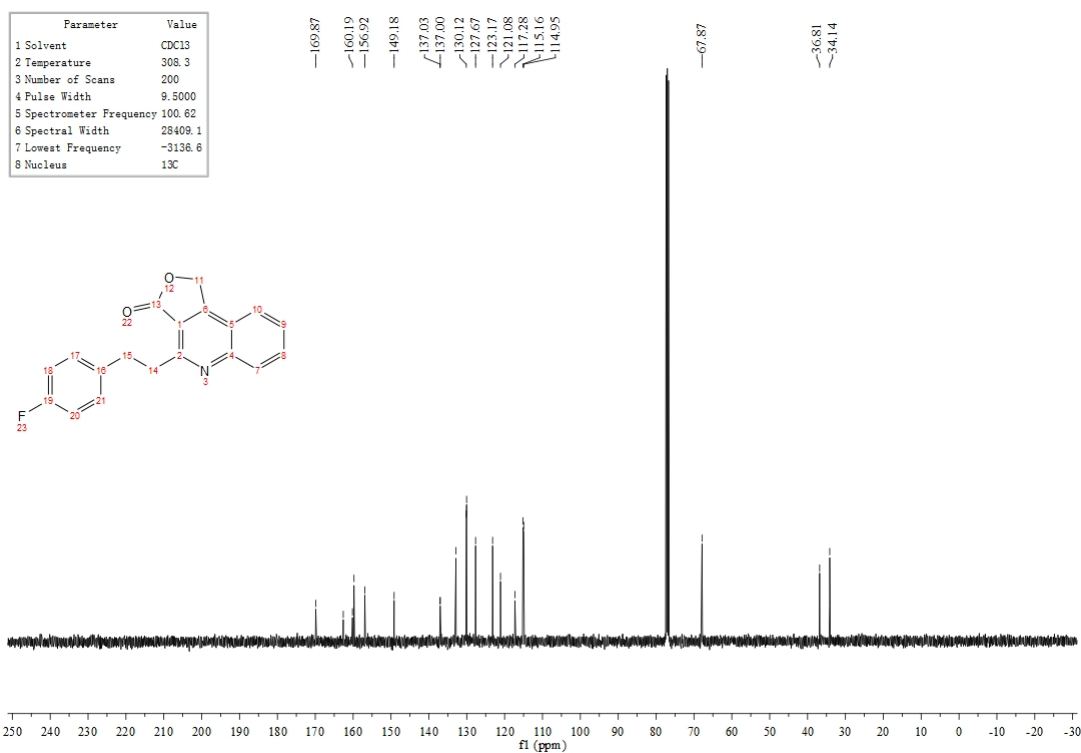

Supplement: c4ra13796e1.pdf [file c4ra13796e1.pdf]
